# Supplementary material for: Phenotypic impact of individual conserved neuronal microexons and their master regulators in zebrafish
Source: bioRxiv preprint, doi:10.1101/2024.10.23.619860, version 4 (2025-07-07)
Supplement: Table S1 [file 619860_file02.xlsx]

## Sheet: Neural_Exons-byLength-N5-Cons-S
GENE	EVENT	COORD	LENGTH	FullCO	COMPLEX	TISSUE_GROUP	dPSI_N_Z	dPSI_eMIC_Z	CONS	Ev_H	dPSI_N_H	dPSI_eMIC_H
tenm3	DreEX0078179	chr1:39041275-39041295	21	chr1:39037744,39041275-39041295,39045649	S	MIC_Neural	92.52	-20.88	REG_50	HsaEX0044642	63.48	68.38
snx14	DreEX0074263	chr20:851858-851881	24	chr20:853947,851858-851881,845675	S	MIC_Neural	63.11	-13.88	REG_50	HsaEX0060805	50.55	38.85
nrcama	DreEX0051524	chr4:13701235-13701252	18	chr4:13697852,13701235-13701252,13701640	S	MIC_Neural	78.14	0.54	REG_50	HsaEX0043771	69.74	93
clasp1a	DreEX0021914	chr9:38443640-38443666	27	chr9:38441666,38443640-38443666,38445982	S	MIC_Neural	28.23	-32.41	REG_50	HsaEX0015476	76.64	91.71
ppp3cca	DreEX0057819	chr5:27330606-27330632	27	chr5:27336003,27330606-27330632,27325037	S	MIC_Neural	76.82	-45.23	REG_50	HsaEX0049748	56.33	66.35
daam1a	DreEX0025590	chr17:14485100-14485126	27	chr17:14485336,14485100-14485126,14480476	S	MIC_Neural	73.2	-48.86	REG_50	HsaEX0018410	64.52	94.88
clasp2	DreEX0021947	chr19:43203859-43203882	24	chr19:43200659,43203859-43203882,43204007+43204010+43204013	S	MIC_Neural	54.13	-53.47	REG_50	HsaEX0015498	76.12	91.72
dctn4	DreEX0026038	chr14:50487501-50487521	21	chr14:50482523,50487501-50487521,50489979	S	MIC_Neural	77.56	-11.67	REG_50	HsaEX0018777	51.37	95.15
dock4b	DreEX0027963	chr4:6940140-6940166	27	chr4:6938278,6940140-6940166,6940288	S	MIC_Neural	56.56	-56.14	REG_50	HsaEX0020591	65.78	91.78
synj1	DreEX0076894	chr10:26576660-26576683	24	chr10:26574543,26576660-26576683,26578649	S	MIC_Neural	91.92	-11.09	REG_50	HsaEX0063208	90.1	84.27
mef2ca	DreEX0045884	chr10:43727876-43727899	24	chr10:43729671,43727876-43727899,43726183	S	MIC_Neural	89.61	-77.63	REG_50	HsaEX0038702	93.41	99.03
pus7	DreEX0059894	chr25:217143-217160	18	chr25:215875,217143-217160,217351	S	MIC_Neural	62.63	-26.02	REG_50	HsaEX0051317	86.64	95.43
kif1b	DreEX0041536	chr23:29533533-29533550	18	chr23:29533655,29533533-29533550,29533317	S	MIC_Neural	87.86	-30.94	REG_50	HsaEX0034475	86.13	96.26
fryl	DreEX0033626	chr20:23513933-23513950	18	chr20:23512073,23513933-23513950,23514688	S	MIC_Neural	64.65	-12.49	REG_50	HsaEX0026468	77.76	89.95
exoc1	DreEX0031062	chr20:25975727-25975744	18	chr20:25976022,25975727-25975744,25974553	S	MIC_Neural	87.57	-24.59	REG_50	HsaEX0023428	65.3	69.05
tmem184ba	DreEX0079584	chr12:19213659-19213685	27	chr12:19213097,19213659-19213685,19215927	S	MIC_Neural	57.3	-63.04	REG_50	HsaEX7010863	51.51	78.23
fryb	DreEX0033604	chr10:34046718-34046735	18	chr10:34045966,34046718-34046735,34047008	S	MIC_Neural	91.53	-27.41	REG_50	HsaEX0026454	87.81	NA
cpeb4	DreEX0023919	chr14:23809024-23809047	24	chr14:23810045,23809024-23809047,23808817	S	MIC_Neural	78.07	-46.3	REG_50	HsaEX0016969	70.14	NA
abi2a	DreEX0010320	chr9:13799620-13799637	18	chr9:13799459,13799620-13799637,13800101	S	MIC_Neural	63.7	-20.62	REG_50	HsaEX0000656	79.41	96.04
eprs	DreEX0030456	chr17:39763474-39763494	21	chr17:39762552,39763474-39763494,39767982	S	MIC_Neural	35.42	-15.19	REG_50	HsaEX0022845	62	77.76
slc43a2b	DreEX0072920	chr10:24408300-24408317	18	chr10:24409871,24408300-24408317,24408079	S	MIC_Neural	46.58	-25.32	REG_50	HsaEX0059697	70.52	97.77
inpp4aa	DreEX0039419	chr9:7068664-7068681	18	chr9:7068084,7068664-7068681,7071044	S	MIC_Neural	94.94	-72.84	REG_50	HsaEX0031714	61.47	56.57
ptprk	DreEX0059683	chr20:1451537-1451554	18	chr20:1451699+1451762,1451537-1451554,1448306	S	MIC_Neural	50.62	-14.67	REG_50	HsaEX0051168	79.49	53.16
tmem245	DreEX0079727	chr16:27272703-27272726	24	chr16:27275124,27272703-27272726,27265034	S	MIC_Neural	72.98	-48.63	REG_50	HsaEX0011689	72.59	17.6
slc38a10	DreEX0072759	chr12:34715177-34715197	21	chr12:34712919,34715177-34715197,34717157	S	MIC_Neural	71.12	-24.45	REG_50	HsaEX0059526	58.41	95.07
NAV1 (2 of 2)	DreEX0006256	chr23:6105952-6105975	24	chr23:6103895,6105952-6105975,6112443	S	MIC_Neural	46.4	-28.28	REG_50	HsaEX0041746	64.74	78.46
ocrl	DreEX0052465	chr14:33493665-33493688	24	chr14:33495454,33493665-33493688,33491220	S	MIC_Neural	69	-41.61	REG_50	HsaEX0044588	67.07	62.46
trrap	DreEX0081616	chr12:17864780-17864800	21	chr12:17859905,17864780-17864800,17865138	S	MIC_Neural	41.73	-27.39	REG_50	HsaEX0067471	71.89	86.75
mapkbp1	DreEX0044981	chr17:10491842-10491859	18	chr17:10489714,10491842-10491859,10495393	S	MIC_Neural	55.63	-19.6	REG_50	HsaEX0037837	75.26	NA
ptk2ab	DreEX0059302	chr16:30846248-30846265	18	chr16:30847200,30846248-30846265,30842620	S	MIC_Neural	81.22	-29.16	REG_50	HsaEX0050855	69.54	95.77
rapgef2	DreEX0060842	chr14:48920113-48920130	18	chr14:48935168,48920113-48920130,48873752	S	MIC_Neural	82.63	-51.53	REG_50	HsaEX0052261	51.53	26.39
sh3glb1b	DreEX0065998	chr2:16520318-16520341	24	chr2:16512976,16520318-16520341,16520616+16520620	C1	MIC_Neural	55.47	-27.47	REG_50	HsaEX0058023	56.37	96.11
tpd52l2b	DreEX0080784	chr23:17508995-17509021	27	chr23:17511860,17508995-17509021,17508425	C1	MIC_Neural	65.45	-24.03	REG_50	HsaEX0066667	53.16	93.84
ap1b1	DreEX0013673	chr5:24282540-24282560	21	chr5:24283010,24282540-24282560,24279730	C1	MIC_Neural	33.34	-62.58	REG_50	HsaEX0004866	78.21	1.87
phf21ab	DreEX0055086	chr25:7599757-7599779	23	chr25:7600769,7599757-7599779,7598255	C3	MIC_Neural	71.53	-24.25	REG_50	HsaEX0047035	61.04	96.08
slc43a2a	DreEX0072910	chr15:28466007-28466024	18	chr15:28465237,28466007-28466024,28468359	S	MIC_Neural	85.66	-40.54	REG_50	HsaEX0059697	70.52	97.77
git1	DreEX0034900	chr15:28528800-28528826	27	chr15:28529271,28528800-28528826,28527096	S	MIC_Neural	86.02	-0.73	REG_50	HsaEX0027507	75.56	87.76
vti1a	DreEX0084665	chr12:31227819-31227839	21	chr12:31239294,31227819-31227839,31218673	S	MIC_Neural	77.19	-49.71	REG_50	HsaEX0070740	76.48	91.54
CPEB2	DreEX0003080	chr23:2218414-2218437	24	chr23:2208532,2218414-2218437,2219290	C2	MIC_Neural	87.74	-59.59	REG_50	HsaEX0016969	70.14	NA
bin1b	DreEX0016939	chr6:6848003-6848026	24	chr6:6853901,6848003-6848026,6846875	C3	MIC_Neural	49.45	-56.46	REG_50	HsaEX0008095	67.84	NA
fmn2b	DreEX0033086	chr12:47476501-47476518	18	chr12:47472010,47476501-47476518,47477060	S	MIC_Neural	82.7	-33.75	REG_50	HsaEX0026020	71.08	99.4
eif4g3b	DreEX0029590	chr23:22083450-22083470	21	chr23:22076024+22076029,22083450-22083470,22092058	C1	MIC_Neural	26.77	-54.57	REG_50	HsaEX0022053	68.02	17.36
ptprub	DreEX0059801	chr16:35018639-35018656	18	chr16:35021851,35018639-35018656,35007492	S	MIC_Neural	70.55	-28.61	REG_50	HsaEX0051231	67.04	49.87
nrg1	DreEX0051571	chr10:7336848-7336871	24	chr10:7343839,7336848-7336871,7332509+7332512	C2	MIC_Neural	76.73	-42.72	REG_50	HsaEX0043801	60.54	NA
src	DreEX0075047	chr23:39527672-39527689	18	chr23:39521889,39527672-39527689,39532636	S	MIC_Neural	87.62	-24.71	REG_50	HsaEX0061640	72.52	66.47
frya	DreEX0033581	chr15:32045364-32045381	18	chr15:32042360,32045364-32045381,32045632	S	MIC_Neural	82.55	-73.18	REG_50	HsaEX0026454	87.81	NA
synj1	DreEX0076889	chr10:26600792-26600815	24	chr10:26598748,26600792-26600815,26603883	S	MIC_Neural	94.77	-45.77	REG_50	HsaEX1039788	89.51	80.32
ptk2aa	DreEX0059275	chr19:1866265-1866282	18	chr19:1863971,1866265-1866282,1868082	C3	MIC_Neural	79.21	-11.12	REG_50	HsaEX0050855	69.54	95.77
itsn1	DreEX0040386	chr1:46337630-46337644	15	chr1:46339236,46337630-46337644,46336157	MIC	MIC_Neural	83.4	-44.94	REG_50	HsaEX0032608	51.48	87.95
nadl1.2	DreEX0049098	chr23:28753853-28753864	12	chr23:28753748,28753853-28753864,28754864	MIC	MIC_Neural	91.2	-17.8	REG_50	HsaEX0035104	95.6	98.82
sh3glb2a	DreEX0066003	chr8:2715585-2715596	12	chr8:2715325,2715585-2715596,2718719	MIC	MIC_Neural	71	0.45	REG_50	HsaEX0058030	58.05	79.73
sh3glb2a	DreEX0066004	chr8:2725463-2725477	15	chr8:2722696,2725463-2725477,2728453+2728456	MIC	MIC_Neural	89.93	-39.76	REG_50	HsaEX0058029	68.15	96.8
erc1a	DreEX0030586	chr25:21119578-21119589	12	chr25:21119293,21119578-21119589,21124141+21124153	MIC	MIC_Neural	54.96	-37.31	REG_50	HsaEX0022977	72.25	44.54
abi1a	DreEX0010301	chr24:5953387-5953401	15	chr24:5946989,5953387-5953401,5957208	MIC	MIC_Neural	85.83	-22.43	REG_50	HsaEX0000641	68.07	97.31
asap2a	DreEX0015082	chr17:35240844-35240847	4	chr17:35239948,35240839+35240844-35240847,35241314	MIC	MIC_Neural	80.03	-55.77	REG_50	HsaEX0006174	70.12	99.04
cadps2	DreEX0018370	chr25:27758860-27758868	9	chr25:27756164,27758860-27758868,27770647	MIC	MIC_Neural	95.79	-41.95	REG_50	HsaEX0012134	61.23	98.73
dock9b	DreEX0028046	chr6:12379868-12379873	6	chr6:12382374,12379868-12379873,12372138	MIC	MIC_Neural	55.58	-32.82	REG_50	HsaEX0020668	60.95	66.05
dock9b	DreEX0028047	chr6:12361041-12361048	8	chr6:12363157,12361041-12361048,12360939	MIC	MIC_Neural	61.96	-41.84	REG_50	HsaEX0020667	65.93	96
asap1a	DreEX0015055	chr2:32317771-32317779	9	chr2:32319812,32317771-32317779,32316192	MIC	MIC_Neural	93.36	-49.41	REG_50	HsaEX0006155	60.01	98.52
asap1b	DreEX0015073	chr24:10807441-10807444	9	chr24:10808032,10807441-10807444+10807449,10807269	MIC	MIC_Neural	92.58	-61.37	REG_50	HsaEX0006155	60.01	98.52
emc1	DreEX0029850	chr23:21342716-21342724	9	chr23:21342303,21342716-21342724,21342891	MIC	MIC_Neural	70.69	-61.88	REG_50	HsaEX0022280	77.4	98.1
git2a	DreEX0034907	chr5:19409358-19409363	6	chr5:19410512,19409358-19409363,19409226	MIC	MIC_Neural	86.48	-62.42	REG_50	HsaEX0027514	73.17	95.82
dock11	DreEX0027937	chr7:18932989-18933000	12	chr7:18937990,18932989-18933000,18931273	MIC	MIC_Neural	80.23	-44.48	REG_50	HsaEX0020546	50.48	98.98
adgrl2a	DreEX0011656	chr11:7641192-7641203	12	chr11:7630940,7641189+7641192-7641203,7642235	MIC	MIC_Neural	48.95	-33.67	REG_50	HsaEX0036234	56.57	98.51
spock3	DreEX0074887	chr1:19967278-19967283	6	chr1:19942571,19967275+19967278-19967283,19968869	MIC	MIC_Neural	85.37	-68.26	REG_50	HsaEX0061500	63.34	NA
evi5b	DreEX0030978	chr6:29024050-29024059	10	chr6:29032153,29024050-29024059+29024063,29021706	MIC	MIC_Neural	75.51	-51.4	REG_50	HsaEX0023360	53.02	91.22
gramd1ba	DreEX0035920	chr10:40346714-40346725	12	chr10:40345454,40346714-40346725,40346829	MIC	MIC_Neural	90.98	-43.72	REG_50	HsaEX0028506	53.94	NA
adgrl2b.1	DreEX0011677	chr2:1420773-1420787	15	chr2:1416978,1420773-1420787,1428262	MIC	MIC_Neural	45.8	-22.01	REG_50	HsaEX0036234	56.57	98.51
ERC1 (3 of 3)	DreEX0004027	chr4:8321383-8321394	12	chr4:8314537,8321383-8321394,8334154	MIC	MIC_Neural	88.75	-27.08	REG_50	HsaEX0022977	72.25	44.54
apbb1	DreEX0013846	chr10:16028844-16028849	6	chr10:16028564,16028844-16028849,16030634	MIC	MIC_Neural	91.13	-51.53	REG_50	HsaEX0005055	81.28	98.74
gramd1a	DreEX0035911	chr16:41958783-41958794	12	chr16:41962191,41958783-41958794,41958599	MIC	MIC_Neural	90.63	-27.96	REG_50	HsaEX0028492	73.9	99.27
gdpd5b	DreEX0034661	chr15:29542531-29542545	15	chr15:29539963,29542531-29542545,29544667	MIC	MIC_Neural	89.4	-15.13	REG_50	HsaEX0027291	76.4	12.74
gdpd5a	DreEX0034649	chr10:38494812-38494826	15	chr10:38495144,38494812-38494826,38491578	MIC	MIC_Neural	30.84	-28.83	REG_50	HsaEX0027291	76.4	12.74
agrn	DreEX0012142	chr23:23957700-23957711	12	chr23:23950612,23957700-23957711,23961553	MIC	MIC_Neural	90.16	-21.72	REG_50	HsaEX0003154	59.33	36.12
cc2d2a	DreEX0019277	chr23:2307387-2307401	15	chr23:2306909,2307387-2307401,2310805	MIC	MIC_Neural	69.97	-55.09	REG_50	HsaEX0012804	94	81.74
RUNDC1	DreEX0007654	chr3:29776629-29776637	9	chr3:29779164,29776629-29776637,29776261	MIC	MIC_Neural	90.01	-50.54	REG_50	HsaEX0055952	53.11	49.43
RELN	DreEX0007444	chr18:50944367-50944372	6	chr18:50943810,50944367-50944372,50945696	MIC	MIC_Neural	46.43	-23.39	REG_50	HsaEX0053031	91.06	NA
apbb2b	DreEX0013859	chr1:19284101-19284106	6	chr1:19278477+19282904,19284101-19284106,19285094	MIC	MIC_Neural	90.27	-34.42	REG_50	HsaEX0005072	65.4	99.06
ap1g1	DreEX0013683	chr7:69022517-69022525	9	chr7:69022941,69022517-69022525,69021943	MIC	MIC_Neural	75.27	-14.98	REG_50	HsaEX0004874	66.34	58.21
SNX2	DreEX0008261	chr8:315691-315699	9	chr8:313599,315688+315691-315699,322955	MIC	MIC_Neural	59.42	-35.92	REG_50	HsaEX0060835	69.5	99.12
prdm10	DreEX0057991	chr18:44350728-44350739	12	chr18:44350863,44350728-44350739,44348569	MIC	MIC_Neural	73.04	-38.14	REG_50	HsaEX0049902	67.08	93.83
ptk2ab	DreEX6041474	chr16:30837481-30837501	21	chr16:30842564,30837481-30837501,30836938	ANN	MIC_Neural	56.08	-11.94	REG_50	HsaEX0050856	71.14	98.52
caska	DreEX0019017	chr9:33596341-33596358	18	chr9:33598853,33596341-33596358,33596227	ANN	MIC_Neural	89.1	-59.53	REG_50	HsaEX0012545	68.96	98.24
arvcfb	DreEX6010954	chr5:25725731-25725748	18	chr5:25730001,25725731-25725748,25722593	ANN	MIC_Neural	86.21	-13.65	REG_50	HsaEX0006131	64.73	93.07
atp11a	DreEX0015646	chr1:45601570-45601593	24	chr1:45602154,45601570-45601593,45594463	S	MIC_Neural	76.91	-8.28	REG_25	HsaEX1005044	31.83	48.72
clasp1a	DreEX0021913	chr9:38439451-38439474	24	chr9:38437732,38439451-38439474,38441559	S	MIC_Neural	74.98	-26.24	REG_25	HsaEX0015478	47.05	79
TRAPPC9 (1 of 2)	DreEX0009049	chr19:4223340-4223366	27	chr19:4220502,4223340-4223366,4225169	S	MIC_Neural	66.65	-9.57	REG_25	HsaEX0066962	31.47	24.64
ckap5	DreEX0021859	chr25:13663957-13663980	24	chr25:13664351,13663957-13663980,13663469	S	MIC_Neural	71.31	-38.36	REG_25	HsaEX0015457	28.22	94.09
ptprfa	DreEX0059606	chr6:2928101-2928118	18	chr6:2917592,2928101-2928118,2933440	S	MIC_Neural	91.06	-9.79	REG_25	HsaEX0051130	36.42	33.11
arhgap44	DreEX0014380	chr12:48545675-48545692	18	chr12:48545593,48545675-48545692,48546322	S	MIC_Neural	71.5	-44.15	REG_25	HsaEX0005529	42.02	NA
ppp6r3	DreEX0057914	chr25:10512387-10512404	18	chr25:10512748,10512387-10512404,10509629	S	MIC_Neural	65.78	-22.74	REG_25	HsaEX0049811	40.98	66.87
UNC13B (2 of 2)	DreEX0009269	chr10:17015882-17015904	23	chr10:17003242+17003263,17015882-17015904,17016595	C1	MIC_Neural	46.6	4.74	REG_25	HsaEX0069337	42.6	0
ARHGAP44 (1 of 2)	DreEX0000602	chr3:44528256-44528273	18	chr3:44541410,44528256-44528273,44520547	S	MIC_Neural	83.69	-28.5	REG_25	HsaEX0005529	42.02	NA
ptprfb	DreEX0059625	chr2:18051937-18051954	18	chr2:18056959,18051937-18051954,18045936	S	MIC_Neural	72.61	-10.75	REG_25	HsaEX0051130	36.42	33.11
rapgef6	DreEX0060879	chr21:45033414-45033437	24	chr21:45033712,45033414-45033437,45030951	S	MIC_Neural	77.26	-16.69	REG_25	HsaEX0052258	33.76	44.46
ADGRL3 (2 of 2)	DreEX0000236	chr7:72835250-72835267	18	chr7:72822450,72835250-72835267,72836142	C3	MIC_Neural	32.45	-27.33	REG_25	HsaEX0036255	47.59	NA
gulp1a	DreEX0036711	chr9:42843533-42843543	11	chr9:42843174,42843533-42843543,42847594	MIC	MIC_Neural	37.02	-11.44	REG_25	HsaEX0029101	34.8	96.16
nav2b	DreEX0049312	chr25:14427304-14427312	9	chr25:14432094,14427304-14427312,14427189	MIC	MIC_Neural	45.25	-19.92	REG_25	HsaEX0041755	29.07	NA
ptk2ab	DreEX0059290	chr16:30785976-30785984	9	chr16:30790105+30814391+30847579,30785976-30785984,30780015+30782818	MIC	MIC_Neural	80.51	-15.93	REG_25	HsaEX0050846	49.43	87.38
mtss1la	DreEX0048005	chr18:14816717-14816725	9	chr18:14823583,14816717-14816725,14814280	MIC	MIC_Neural	74.93	-8.95	REG_25	HsaEX0040737	41.59	56.88
fryl	DreEX0033622	chr20:23492200-23492208	9	chr20:23491961,23492200-23492208,23493842	MIC	MIC_Neural	71.9	-47.79	REG_25	HsaEX0026467	37.58	96.04
tpd52l1	DreEX0080767	chr20:39795631-39795645	15	chr20:39799084,39795631-39795645,39790875+39792296	MIC	MIC_Neural	46.12	-22.98	REG_25	HsaEX0066659	33.18	93.98
ank2b	DreEX0013086	chr7:57651911-57651922	12	chr7:57653974,57651911-57651922,57651740	MIC	MIC_Neural	88.16	-75.04	REG_25	HsaEX0004127	41.22	87.28
vav2	DreEX0084167	chr21:18032729-18032743	15	chr21:18032890,18032729-18032743,18029369	MIC	MIC_Neural	54.76	-37.19	REG_25	HsaEX0070259	45.75	91.7
gulp1b	DreEX0036722	chr6:11267507-11267517	11	chr6:11268371,11267503+11267507-11267517,11262626	MIC	MIC_Neural	64.79	-7.31	REG_25	HsaEX0029101	34.8	96.16
myo5aa	DreEX0048705	chr18:39036506-39036514	9	chr18:39036371,39036506-39036514,39037497	MIC	MIC_Neural	68.73	-22.01	REG_25	HsaEX0041193	32.15	39.07
ank3a	DreEX0013114	chr17:20738845-20738856	12	chr17:20743142,20738845-20738856,20731572+20731587	MIC	MIC_Neural	79.79	-11.07	REG_25	HsaEX0004145	40.32	61.54
TACC2	DreEX0008613	chr13:28761232-28761240	9	chr13:28760464,28761232-28761240,28762159	MIC	MIC_Neural	93.29	-32.03	REG_25	HsaEX0063374	37.44	82.49
micu1	DreEX0046514	chr13:4814711-4814716	6	chr13:4787629,4814711-4814716,4817123+4817135	MIC	MIC_Neural	74.68	-26.04	REG_25	HsaEX0039245	43.08	0.2
kcnma1a	DreEX0040954	chr13:16683163-16683174	12	chr13:16680233,16683163-16683174,16687183	MIC	MIC_Neural	33.02	14.12	REG_25	HsaEX0033052	29.86	0
nbeaa	DreEX0049383	chr10:34723601-34723624	24	chr10:34722691,34723601-34723624,34727096	ANN	MIC_Neural	67.69	-6.32	REG_25	HsaEX0041810	49.5	NA
fnbp1b	DreEX6103911	chr21:6259638-6259652	15	chr21:6235918,6259638-6259652,6268350	ANN	MIC_Neural	77.83	NA	REG_25	HsaEX0026113	49.77	58.8
acvr2aa	DreEX0011037	chr9:25589591-25589614	24	chr9:25597725,25589591-25589614,25582217	S	MIC_Neural	26.42	-14.99	REG_15	HsaEX0002213	22.63	89.17
ptprsa	DreEX0059753	chr22:3476962-3476973	12	chr22:3478861,3476962-3476973,3467611	MIC	MIC_Neural	33.85	-16.36	REG_15	HsaEX0051216	20.16	0
spag9a	DreEX0074637	chr3:18197225-18197236	12	chr3:18199533,18197225-18197236,18193120	MIC	MIC_Neural	76.86	-23.42	REG_15	HsaEX0061188	19.37	89.18
cltcb	DreEX0022266	chr15:17357577-17357579	3	chr15:17350273+17357155,17357577-17357579,17360647	MIC	MIC_Neural	59.59	-38.42	REG_15	HsaEX0015816	17.21	81.98
ptprfa	DreEX0059604	chr6:2941367-2941378	12	chr6:2933550,2941367-2941378,2952343	MIC	MIC_Neural	27.83	-22.54	REG_15	HsaEX0051135	19.29	23.22
uggt1	DreEX0083213	chr2:41017705-41017728	24	chr2:41021495,41017705-41017728,41015538	S	MIC_Neural	48.35	-13.62	NO_REG	HsaEX0069151	10.54	2.29
slit2	DreEX0073464	chr1:23198410-23198436	27	chr1:23198212,23198410-23198436,23198824	S	MIC_Neural	33.88	-26.06	NO_REG	HsaEX0060156	9	10.21
phka2	DreEX0055154	chr11:33616814-33616837	24	chr11:33617185,33616814-33616837,33613284	C3	MIC_Neural	59.56	2.62	NO_REG	HsaEX0047123	-37.23	26.61
sh3glb2b	DreEX0066015	chr5:31061709-31061732	24	chr5:31064919,31061709-31061732,31059077	C2	MIC_Neural	70.08	-62.08	NO_REG	HsaEX0058025	1.02	5.25
nktr	DreEX0050760	chr24:20506016-20506041	26	chr24:20506585,20506016-20506041,20505543	S	MIC_Neural	37.07	-14.42	NO_REG	HsaEX0043065	-23.53	66.27
mast3b	DreEX0045163	chr11:13279320-13279340	21	chr11:13279552,13279320-13279340,13276038	S	MIC_Neural	91.79	-24.84	NO_REG	HsaEX0037994	-2.14	NA
si:ch211-200p22.4	DreEX0067362	chr7:23492001-23492024	24	chr7:23496927,23492001-23492024,23488159	S	MIC_Neural	53.59	-32.5	NO_REG	HsaEX0047352	-31.83	58.88
gne	DreEX0035359	chr1:11619936-11619959	24	chr1:11615302,11619936-11619959,11621679	C3	MIC_Neural	66.91	-38.42	NO_REG	HsaEX0027873	0.84	-0.62
vdac3	DreEX0084235	chr8:2364780-2364782	3	chr8:2367374,2364780-2364782,2362855	MIC	MIC_Neural	87.58	-40.96	NO_REG	HsaEX0070291	1.61	5.56
ptprfb	DreEX0059639	chr2:17953511-17953522	12	chr2:17958683,17953511-17953522,17946437	MIC	MIC_Neural	73.94	-37.17	NO_REG	HsaEX0051134	9.21	28.34
exoc6	DreEX0031112	chr12:8936307-8936318	12	chr12:8938992,8936307-8936318,8931956	MIC	MIC_Neural	86.46	-32.34	NO_REG	HsaEX0023471	13.84	6.85
gli2b	DreEX0035002	chr11:43591910-43591920	11	chr11:43596862,43591910-43591920,43584005	MIC	MIC_Neural	46.38	-4.91	NO_REG	HsaEX1015603	0	13.76
ift88	DreEX0038810	chr9:21566893-21566898	6	chr9:21567076,21566893-21566898,21566687	MIC	MIC_Neural	32.21	-33.42	NO_REG	HsaEX0031098	10.86	NA
phyhd1	DreEX0055283	chr21:4347592-4347597	6	chr21:4347467,4347592-4347597,4350333	MIC	MIC_Neural	43.63	-62.45	NO_REG	HsaEX0047264	-1.98	-10.53
dctn2	DreEX0026022	chr6:58844405-58844410	6	chr6:58841570,58844405-58844410,58858532	MIC	MIC_Neural	79.95	-16.11	NO_REG	HsaEX1011150	0.49	0.27
cyfip2	DreEX0025322	chr14:33653700-33653702	3	chr14:33654721,33653700-33653702,33651520	MIC	MIC_Neural	71.87	-81.88	NO_REG	HsaEX1010822	0.01	0
col4a6	DreEX0023333	chr7:50665787-50665795	9	chr7:50666340,50665787-50665795,50661521	MIC	MIC_Neural	34.11	-20.16	NO_REG	HsaEX1009414	-0.01	0
ptprsa	DreEX0059754	chr22:3423145-3423156	12	chr22:3426379,3423145-3423156+3423159,3422657+3422660	MIC	MIC_Neural	83.52	-35.38	NO_REG	HsaEX0051217	10.74	27.35
vps8	DreEX0084571	chr1:29284012-29284017	6	chr1:29283774,29284012-29284017,29285210	MIC	MIC_Neural	76.88	-34.83	NO_REG	HsaEX0070666	0	0
march8	DreEX0045047	chr13:17632106-17632120	15	chr13:17635955,17632106-17632120,17621643+17625667	MIC	MIC_Neural	60.27	-50.27	NO_REG	HsaEX0037897	0.33	-3.99
spock2	DreEX0074881	chr13:29952521-29952529	9	chr13:29924950,29952521-29952529,29952886	MIC	MIC_Neural	71.62	-46.1	NO_REG	HsaEX0061496	0.05	NA
bbs9	DreEX0016703	chr16:7068983-7068997	15	chr16:7062289,7068983-7068997,7074466	MIC	MIC_Neural	94.01	-84.34	NO_REG	HsaEX0007789	5.05	17.48
exoc7	DreEX0031137	chr12:46716017-46716028	12	chr12:46715861,46716017-46716028,46719626+46722395+46726150	MIC	MIC_Neural	79.59	-40.47	NO_REG	HsaEX0023502	2.09	0
ptprfa	DreEX0059605	chr6:3065241-3065252	12	chr6:3063057,3065241-3065252,3069890	MIC	MIC_Neural	93.47	-87.26	NO_REG	HsaEX0051134	9.21	28.34
adgrl2a	DreEX0011657	chr11:7719630-7719647	18	chr11:7712295,7719630-7719647,7724920	ANN	MIC_Neural	69.78	-19.73	NO_REG	HsaEX6031765	5.35	5.92
abi2b	DreEX0010329	chr6:9749542-9749559	18	chr6:9747777,9749542-9749559,9749667	S	MIC_Neural	88.15	-55.42	NO_G_ORTH	NA	NA	NA
fmnl2b	DreEX0033111	chr6:13174974-13174994	21	chr6:13175336,13174974-13174994,13174821	S	MIC_Neural	87.19	-40.22	NO_G_ORTH	NA	NA	NA
tpd52l2a	DreEX0080776	chr8:23185133-23185156	24	chr8:23181529,23185133-23185156,23188997	C1	MIC_Neural	79.22	-60.08	NO_G_ORTH	NA	NA	NA
shank3b	DreEX0066093	chr4:9559200-9559220	21	chr4:9559519,9559200-9559220,9558755	C1	MIC_Neural	89.99	NA	NO_G_ORTH	NA	NA	NA
mhc1zaa	DreEX0046354	chr1:46436631-46436657	27	chr1:46438258,46436631-46436657,46435991	S	MIC_Neural	69.42	-15.02	NO_G_ORTH	NA	NA	NA
si:dkey-126h10.2	DreEX0069265	chr20:1648430-1648453	24	chr20:1650538,1648430-1648453,1561572	S	MIC_Neural	69.64	-36.43	NO_G_ORTH	NA	NA	NA
unm_sa1614	DreEX0083453	chr11:26280708-26280716	9	chr11:26276733,26280705+26280708-26280716,26283243	MIC	MIC_Neural	84.25	-47.22	NO_G_ORTH	NA	NA	NA
kcnn1b	DreEX0040973	chr8:13217279-13217287	9	chr8:13219999,13217279-13217287,13207130+13210602	MIC	MIC_Neural	56.78	8.75	NO_G_ORTH	NA	NA	NA
zgc:171497	DreEX0087320	KN150335.1:14783-14792	10	KN150335.1:15526,14783-14792,12735	MIC	MIC_Neural	38.65	-2.39	NO_G_ORTH	NA	NA	NA
sept15	DreEX0065253	chr25:12768114-12768125	12	chr25:12768487,12768114-12768125,12762987	MIC	MIC_Neural	34.63	-38.22	NO_G_ORTH	NA	NA	NA
CABZ01084323.1	DreEX0002174	KN150000.1:14221-14230	10	KN150000.1:11773,14219+14221-14230,17903	MIC	MIC_Neural	95	-20.02	NO_G_ORTH	NA	NA	NA
CABZ01084323.1	DreEX0002175	KN150000.1:42474-42481	8	KN150000.1:40277,42467+42470+42474-42481,42670	MIC	MIC_Neural	90.73	-71.58	NO_G_ORTH	NA	NA	NA
dip2ba	DreEX0027020	chr23:27449350-27449373	24	chr23:27449714,27449350-27449373,27446675	S	MIC_Neural	30.1	-6.99	NO_EV_ORTH	NA	NA	NA
dvl1a	DreEX0028567	chr23:30062467-30062488	22	chr23:30054534,30062467-30062488,30065401	S	MIC_Neural	53.82	-43.79	NO_EV_ORTH	NA	NA	NA
pdha1a	DreEX0054374	chr5:23539698-23539718	21	chr5:23540745,23539698-23539718,23536641	S	MIC_Neural	48.02	-21.28	NO_EV_ORTH	NA	NA	NA
ctnnb1	DreEX0024849	chr16:6290912-6290938	27	chr16:6291043,6290912-6290938,6290519	S	MIC_Neural	55.27	-10.95	NO_EV_ORTH	NA	NA	NA
reep3a	DreEX0061623	chr17:19595882-19595905	24	chr17:19596899,19595882-19595905,19594499	S	MIC_Neural	28.18	-7.39	NO_EV_ORTH	NA	NA	NA
clasp2	DreEX0021946	chr19:43186557-43186577	21	chr19:43185609,43186557-43186577,43189129	S	MIC_Neural	72.58	-48.03	NO_EV_ORTH	NA	NA	NA
prom1a	DreEX0058509	chr14:47493106-47493123	18	chr14:47493268,47493106-47493123,47491023	S	MIC_Neural	48.1	-25.29	NO_EV_ORTH	NA	NA	NA
DAB2	DreEX0003483	chr5:43277465-43277481	17	chr5:43278478,43277465-43277481,43275973+43275976+43276019	S	MIC_Neural	51.69	-24.31	NO_EV_ORTH	NA	NA	NA
arhgef1b	DreEX0014527	chr16:26312452-26312470	19	chr16:26312691,26312452-26312470,26309712	S	MIC_Neural	39.35	-17.63	NO_EV_ORTH	NA	NA	NA
pikfyve	DreEX0055638	chr9:32274246-32274272	27	chr9:32271627,32274246-32274272,32274436	S	MIC_Neural	74.98	-13.99	NO_EV_ORTH	NA	NA	NA
mtss1	DreEX0047991	chr6:50588019-50588045	27	chr6:50588398,50588019-50588045,50586495	S	MIC_Neural	41.99	-18.84	NO_EV_ORTH	NA	NA	NA
dennd4a	DreEX0026450	chr18:19092224-19092250	27	chr18:19092666,19092224-19092250,19085530	S	MIC_Neural	85.68	-28.31	NO_EV_ORTH	NA	NA	NA
TNKS (1 of 2)	DreEX0008971	chr5:8479561-8479581	21	chr5:8475564,8479561-8479581,8483794	S	MIC_Neural	71.74	-24.89	NO_EV_ORTH	NA	NA	NA
ccny	DreEX0019841	chr24:4375830-4375853	24	chr24:4375518,4375830-4375853,4377061	S	MIC_Neural	66.13	-44.59	NO_EV_ORTH	NA	NA	NA
ABCA7	DreEX0000047	chr11:5686054-5686077	24	chr11:5683046,5686054-5686077,5686186	S	MIC_Neural	92.98	-91.36	NO_EV_ORTH	NA	NA	NA
dock7	DreEX0028015	chr6:32417146-32417165	20	chr6:32416191,32417146-32417165,32417265	S	MIC_Neural	79.43	-57.3	NO_EV_ORTH	NA	NA	NA
sdk1a	DreEX0064721	chr3:41028299-41028325	27	chr3:41077178,41028299-41028325,41023574	S	MIC_Neural	60.08	-36.84	NO_EV_ORTH	NA	NA	NA
bcam	DreEX0016717	chr16:24115861-24115881	21	chr16:24118351,24115861-24115881,24115568	S	MIC_Neural	85.13	-14.33	NO_EV_ORTH	NA	NA	NA
ssh2b	DreEX0075418	chr21:40448388-40448409	22	chr21:40443651,40448388-40448409,40450903	S	MIC_Neural	71.68	-26.79	NO_EV_ORTH	NA	NA	NA
ATP11B	DreEX0000717	chr22:37035726-37035749	24	chr22:37037618,37035726-37035749,37032982	S	MIC_Neural	75.14	-25.55	NO_EV_ORTH	NA	NA	NA
lipeb	DreEX0043115	chr16:26241119-26241145	27	chr16:26241359,26241119-26241145,26237748	S	MIC_Neural	43.5	-57.43	NO_EV_ORTH	NA	NA	NA
rims2b	DreEX0062259	chr19:13179327-13179353	27	chr19:13176454,13179327-13179353,13181078	S	MIC_Neural	30.58	-29.3	NO_EV_ORTH	NA	NA	NA
chl1b	DreEX0021596	chr6:44921544-44921561	18	chr6:44919321,44921544-44921561,44923745	S	MIC_Neural	76.58	-31.48	NO_EV_ORTH	NA	NA	NA
map7d1b	DreEX0044788	chr19:4037664-4037684	21	chr19:4038021,4037664-4037684,4028817	S	MIC_Neural	88.88	-45.47	NO_EV_ORTH	NA	NA	NA
ppm1ba	DreEX0057497	chr13:10554636-10554652	17	chr13:10558370,10554636-10554652,10551646	S	MIC_Neural	31.89	-48.7	NO_EV_ORTH	NA	NA	NA
chchd6a	DreEX0021351	chr23:34159809-34159832	24	chr23:34127054,34159809-34159832,34167297	S	MIC_Neural	69.51	-30.33	NO_EV_ORTH	NA	NA	NA
celf1	DreEX0020617	chr7:38273168-38273188	21	chr7:38273366,38273168-38273188,38270113+38270154	S	MIC_Neural	65.98	-28.09	NO_EV_ORTH	NA	NA	NA
ncam1b	DreEX0049495	chr15:18533346-18533369	24	chr15:18533553,18533346-18533369,18515486	C1	MIC_Neural	51.69	-7.04	NO_EV_ORTH	NA	NA	NA
osbpl7	DreEX0052802	chr12:28673236-28673259	24	chr12:28673559,28673236-28673259,28672413	S	MIC_Neural	55.65	-58.35	NO_EV_ORTH	NA	NA	NA
camk2d2	DreEX0018617	chr1:13485579-13485599	21	chr1:13490027,13485579-13485599,13483213	C1	MIC_Neural	34.74	-46.03	NO_EV_ORTH	NA	NA	NA
metap1	DreEX0046066	chr13:12487226-12487249	24	chr13:12483679,12487226-12487249,12489629	S	MIC_Neural	39.82	-11.66	NO_EV_ORTH	NA	NA	NA
spsb4b	DreEX0074981	chr15:41725463-41725481	19	chr15:41725646,41725463-41725481,41720375	S	MIC_Neural	64.16	-34.59	NO_EV_ORTH	NA	NA	NA
tpd52l1	DreEX0080770	chr20:39827870-39827893	24	chr20:39833262,39827870-39827893,39815130	C1	MIC_Neural	50.72	-20.89	NO_EV_ORTH	NA	NA	NA
eps15l1a	DreEX0030487	chr22:15888601-15888617	17	chr22:15891405+15891452,15888601-15888617,15886129	S	MIC_Neural	71.32	-19.83	NO_EV_ORTH	NA	NA	NA
chchd6b	DreEX0021359	chr6:1557239-1557259	21	chr6:1559047,1557239-1557259,1555014	S	MIC_Neural	74.77	-19.37	NO_EV_ORTH	NA	NA	NA
tsga10	DreEX0081679	chr1:49019443-49019463	21	chr1:49019343,49019443-49019463,49020840	S	MIC_Neural	68.36	-66.63	NO_EV_ORTH	NA	NA	NA
atxn2	DreEX0016233	chr5:41065425-41065442	18	chr5:41067396,41065425-41065442,41064767	S	MIC_Neural	56.11	-23.34	NO_EV_ORTH	NA	NA	NA
aspg	DreEX0015304	chr17:45784855-45784878	24	chr17:45782933,45784855-45784878,45790616	C2	MIC_Neural	68.07	-22.08	NO_EV_ORTH	NA	NA	NA
aspg	DreEX0015305	chr17:45788799-45788825	27	chr17:45782933,45788799-45788825,45790616	C1	MIC_Neural	68.68	-23.77	NO_EV_ORTH	NA	NA	NA
arhgap23a	DreEX0014281	chr3:39179851-39179875	25	chr3:39180176+39180181+39180193,39179851-39179875,39177654	S	MIC_Neural	61.42	-26.53	NO_EV_ORTH	NA	NA	NA
adgrl3.1	DreEX0011687	chr1:22257864-22257881	18	chr1:22260247,22257864-22257881,22255441	C1	MIC_Neural	79.96	-32.17	NO_EV_ORTH	NA	NA	NA
ppip5k1b	DreEX0057469	chr25:19238322-19238344	23	chr25:19227405,19238322-19238344,19242188	C3	MIC_Neural	40.34	-6.41	NO_EV_ORTH	NA	NA	NA
als2b	DreEX0012858	chr6:9591601-9591624	24	chr6:9591400,9591601-9591624,9595798	S	MIC_Neural	44.84	-6.36	NO_EV_ORTH	NA	NA	NA
ppip5k2	DreEX0057481	chr10:6832248-6832268	21	chr10:6850933,6832248-6832268,6827949	C2	MIC_Neural	39	-36.84	NO_EV_ORTH	NA	NA	NA
agrn	DreEX0012143	chr23:23676363-23676383	21	chr23:23561339,23676363-23676383,23741033	S	MIC_Neural	32.74	3	NO_EV_ORTH	NA	NA	NA
zdhhc5b	DreEX0086313	chr14:50034926-50034948	23	chr14:50034616,50034926-50034948,50040719	C2	MIC_Neural	41.74	-20.02	NO_EV_ORTH	NA	NA	NA
hdac11	DreEX0037039	chr11:26906801-26906827	27	chr11:26900501,26906801-26906827,26907191	S	MIC_Neural	26.08	NA	NO_EV_ORTH	NA	NA	NA
CIT	DreEX0002786	chr5:2176293-2176316	24	chr5:2180933,2176293-2176316,2166052	S	MIC_Neural	52.28	-8.62	NO_EV_ORTH	NA	NA	NA
CENPF (2 of 2)	DreEX0002642	chr14:8365431-8365447	17	chr14:8363194,8365431-8365447,8369679	S	MIC_Neural	46.6	-21.03	NO_EV_ORTH	NA	NA	NA
tln1	DreEX0079141	chr10:6297544-6297561	18	chr10:6297385,6297544-6297561,6298483	S	MIC_Neural	38.36	-13.21	NO_EV_ORTH	NA	NA	NA
rab3ip	DreEX0060280	chr4:71117888-71117905	18	chr4:71116677,71117888-71117905,71118113	S	MIC_Neural	28.02	-16.41	NO_EV_ORTH	NA	NA	NA
tmem67	DreEX0079892	chr16:27639346-27639354	9	chr16:27639237,27639346-27639354,27639878	S	MIC_Neural	36.32	-22.91	NO_EV_ORTH	NA	NA	NA
ap2m1a	DreEX0013740	chr2:10003553-10003567	15	chr2:10003782,10003553-10003567,9999392+9999407	MIC	MIC_Neural	41.18	-54.87	NO_EV_ORTH	NA	NA	NA
tnikb	DreEX0080180	chr24:26375452-26375460	9	chr24:26378833+26382193+26460410,26375452-26375460,26373796+26373928	MIC	MIC_Neural	25.92	-35.59	NO_EV_ORTH	NA	NA	NA
sept4a	DreEX0065273	chr21:39500804-39500811	8	chr21:39501394,39500804-39500811,39491903	MIC	MIC_Neural	65.73	-78.46	NO_EV_ORTH	NA	NA	NA
ttyh2l	DreEX0082293	chr3:51399856-51399868	13	chr3:51399029,51399856-51399868,51401977	MIC	MIC_Neural	28.2	-8.76	NO_EV_ORTH	NA	NA	NA
sh3glb1b	DreEX0065997	chr2:16522990-16523001	12	chr2:16522877,16522990-16523001,16523095	MIC	MIC_Neural	41.25	-19.34	NO_EV_ORTH	NA	NA	NA
picalma	DreEX0055371	chr10:29296078-29296089	12	chr10:29293042,29296078-29296089,29297741	MIC	MIC_Neural	78.56	-33.04	NO_EV_ORTH	NA	NA	NA
picalmb	DreEX0055387	chr15:19817656-19817667	12	chr15:19818691,19817656-19817667,19817526	MIC	MIC_Neural	86.13	-50.31	NO_EV_ORTH	NA	NA	NA
tln2a	DreEX0079151	chr7:29668678-29668683	6	chr7:29668569,29668678-29668683+29668692,29668982	MIC	MIC_Neural	72.67	-34.58	NO_EV_ORTH	NA	NA	NA
acot7	DreEX0010726	chr8:46864160-46864174	15	chr8:46864816,46864160-46864174,46862555	MIC	MIC_Neural	93.29	-75	NO_EV_ORTH	NA	NA	NA
pfkpa	DreEX0054831	chr24:3969844-3969849	6	chr24:3969534,3969844-3969849,3970777	MIC	MIC_Neural	56.39	-41.94	NO_EV_ORTH	NA	NA	NA
macf1a	DreEX0044250	chr19:35585550-35585561	12	chr19:35587986,35585550-35585561,35583149	MIC	MIC_Neural	44.18	-17.99	NO_EV_ORTH	NA	NA	NA
dnmt1	DreEX0027818	chr3:54346655-54346669	15	chr3:54347058,54346655-54346669,54346251	MIC	MIC_Neural	73.88	-14.78	NO_EV_ORTH	NA	NA	NA
si:ch211-259g3.4	DreEX0068029	chr15:16194565-16194573	9	chr15:16196902,16194565-16194573,16194266	MIC	MIC_Neural	61.46	-25.71	NO_EV_ORTH	NA	NA	NA
lrba	DreEX0043564	chr1:23401241-23401255	15	chr1:23401567,23401241-23401255,23390443	MIC	MIC_Neural	32.19	-37.22	NO_EV_ORTH	NA	NA	NA
hexb	DreEX0037402	chr5:34009456-34009461	6	chr5:34011943,34009456-34009461,34009257	MIC	MIC_Neural	34.25	-82.35	NO_EV_ORTH	NA	NA	NA
sh3glb2b	DreEX0066007	chr5:31080364-31080375	12	chr5:31082722,31080364-31080375,31078288	MIC	MIC_Neural	90.95	-74.95	NO_EV_ORTH	NA	NA	NA
foxk1	DreEX0033317	chr3:40771581-40771586	6	chr3:40771703,40771581-40771586,40768632	MIC	MIC_Neural	34.52	-11.82	NO_EV_ORTH	NA	NA	NA
mrpl12	DreEX0047335	chr3:49024181-49024195	15	chr3:49027442,49024181-49024195,49023967	MIC	MIC_Neural	54.82	-12.38	NO_EV_ORTH	NA	NA	NA
ift80	DreEX0038783	chr15:1533656-1533658	3	chr15:1534780,1533656-1533658+1533661,1533135	MIC	MIC_Neural	31.28	-48.22	NO_EV_ORTH	NA	NA	NA
map4k5	DreEX0044744	chr13:36591469-36591471	3	chr13:36591633,36591469-36591471,36591209	MIC	MIC_Neural	62.02	-13.32	NO_EV_ORTH	NA	NA	NA
arhgef11	DreEX0014462	chr7:5353909-5353923	15	chr7:5361003+5365326,5353909-5353923,5349259	MIC	MIC_Neural	40.76	-54.8	NO_EV_ORTH	NA	NA	NA
ap2a1	DreEX0013723	chr3:32267567-32267578	12	chr3:32267377,32267567-32267578,32267858	MIC	MIC_Neural	30.84	-43.46	NO_EV_ORTH	NA	NA	NA
pikfyve	DreEX0055636	chr9:32267933-32267944	12	chr9:32267376,32267933-32267944,32268726	MIC	MIC_Neural	49.79	3.91	NO_EV_ORTH	NA	NA	NA
dync1i1	DreEX0028594	chr16:25408730-25408735	6	chr16:25406325,25408730-25408735,25408990	MIC	MIC_Neural	46.08	-36.03	NO_EV_ORTH	NA	NA	NA
pnpla7a	DreEX0056697	chr21:13525070-13525079	10	chr21:13525315,13525070-13525079+13525082,13524783	MIC	MIC_Neural	29.89	-9.39	NO_EV_ORTH	NA	NA	NA
ATL2	DreEX0000709	chr11:44196933-44196947	15	chr11:44192380,44196933-44196947,44197979	MIC	MIC_Neural	92.41	-69.94	NO_EV_ORTH	NA	NA	NA
lpcat3	DreEX0043476	chr16:12337507-12337509	3	chr16:12340567,12337507-12337509,12332136	MIC	MIC_Neural	67.33	-28.41	NO_EV_ORTH	NA	NA	NA
emid1	DreEX0029880	chr5:24392530-24392541	12	chr5:24392703,24392530-24392541,24387501	MIC	MIC_Neural	63.5	-28.73	NO_EV_ORTH	NA	NA	NA
sec22bb	DreEX0064793	chr8:19474585-19474591	7	chr8:19472141,19474580+19474585-19474591,19474684+19474696	MIC	MIC_Neural	85.03	-66.65	NO_EV_ORTH	NA	NA	NA
nsmfb	DreEX0051772	chr5:27846300-27846305	6	chr5:27845000,27846300-27846305,27859080	MIC	MIC_Neural	81.48	-30.31	NO_EV_ORTH	NA	NA	NA
baiap2b	DreEX0016553	chr12:35956698-35956706	9	chr12:35935245+35938446,35956695+35956698-35956706,35957206	MIC	MIC_Neural	65.33	-25.17	NO_EV_ORTH	NA	NA	NA
dock9a	DreEX0028031	chr9:976627-976634	8	chr9:976529,976627-976634,978757	MIC	MIC_Neural	40.92	-69.57	NO_EV_ORTH	NA	NA	NA
cryzl1	DreEX0024456	chr1:46408036-46408056	21	chr1:46407726,46408036-46408056,46408240	ANN	MIC_Neural	83.53	-4.92	NO_EV_ORTH	NA	NA	NA
cacna2d4b	DreEX0018202	chr25:18931454-18931474	21	chr25:18932199,18931454-18931474,18930717	S	MIC_Neural	26.61	-8.32	NO_COV	HsaEX6064500	NA	NA
GK2	DreEX0004728	chr1:27956037-27956054	18	chr1:27968661,27956037-27956054,27949874	S	MIC_Neural	55.55	-31.46	NO_COV	HsaEX1015558	NA	0.39
csnk1g1	DreEX0024575	chr7:53842972-53842995	24	chr7:53846127,53842972-53842995,53835892	S	MIC_Neural	47.14	-27.5	NO_COV	HsaEX0017544	NA	NA
slc8a2a	DreEX0073320	chr5:36287583-36287600	18	chr5:36286867,36287583-36287600,36288973	S	MIC_Neural	37.75	-12.32	NO_COV	HsaEX0060015	NA	NA
SCYL2	DreEX0007764	chr4:26080689-26080700	12	chr4:26079698,26080689-26080700,26081460	MIC	MIC_Neural	90.93	-44.36	NO_COV	HsaEX7106791	NA	NA
psd2	DreEX0058791	chr14:7907187-7907189	3	chr14:7903267,7907187-7907189,7912073	MIC	MIC_Neural	82.11	-19.84	NO_COV	HsaEX0050530	NA	NA
kcnma1a	DreEX0040955	chr13:16692579-16692587	9	chr13:16687478,16692579-16692587,16695104+16711346	MIC	MIC_Neural	62.76	-54.65	NO_COV	HsaEX0033053	NA	NA
nrcama	DreEX0051526	chr4:13710917-13710946	30	chr4:13710756,13710917-13710946,13711642	S	MINI_Neural	89.14	-20.86	REG_50	HsaEX0043773	56.74	14.29
sgce	DreEX0065763	chr19:41452022-41452059	38	chr19:41454809,41452022-41452059,41451924	S	MINI_Neural	71.49	-46.18	REG_50	HsaEX0057775	55.97	94.97
ppp3cb	DreEX0057810	chr14:7492041-7492088	48	chr14:7492441,7492041-7492088,7484389	S	MINI_Neural	68.63	-24.24	REG_50	HsaEX0049737	69.76	61.19
mllt4a	DreEX0046818	chr20:43245931-43245966	36	chr20:43252038,43245931-43245966,43242096+43242102	S	MINI_Neural	33.77	-9.49	REG_50	HsaEX0039568	52.3	49.83
camsap1b	DreEX0018711	chr5:64956305-64956337	33	chr5:64959478,64956305-64956337,64952533	S	MINI_Neural	31.27	-7.71	REG_50	HsaEX0012280	60.47	9.98
zgc:91860	DreEX0087786	chr18:17463298-17463327	30	chr18:17462832,17463298-17463327,17468754	S	MINI_Neural	81.96	-41.79	REG_50	HsaEX0033671	80.62	100
CAMSAP3 (1 of 2)	DreEX0002295	chr3:53171532-53171564	33	chr3:53171308,53171532-53171564,53185162	S	MINI_Neural	48.42	-16.64	REG_50	HsaEX0034175	90.13	15.14
si:ch211-233a24.2	DreEX0067773	chr13:12776528-12776578	51	chr13:12774861,12776528-12776578,12778578	S	MINI_Neural	76.66	-10.35	REG_50	HsaEX0033934	67.48	75.76
atp9b	DreEX0016118	chr19:22590343-22590375	33	chr19:22588968,22590343-22590375,22592729	S	MINI_Neural	76.17	-24.46	REG_50	HsaEX0007129	59.72	29.09
ptprk	DreEX0059684	chr20:1462300-1462335	36	chr20:1466629,1462300-1462335,1456067	S	MINI_Neural	81.29	-29.68	REG_50	HsaEX0051169	55.49	47.97
adgrl2b.1	DreEX0011680	chr2:1499330-1499368	39	chr2:1486204,1499330-1499368,1503832	S	MINI_Neural	35.77	-37.21	REG_50	HsaEX0036237	52.24	86.61
si:ch1073-280h16.1	DreEX0066275	chr22:35316189-35316236	48	chr22:35313084,35316189-35316236,35318019	S	MINI_Neural	63.21	20.57	REG_50	HsaEX0033516	78.08	25.62
meaf6	DreEX0045714	chr19:4098855-4098884	30	chr19:4096959,4098855-4098884,4099187	S	MINI_Neural	74.87	-26.76	REG_50	HsaEX0038484	88.4	98.16
tpd52l2b	DreEX0080785	chr23:17508657-17508698	42	chr23:17508995,17508657-17508698+17508701,17508425	C3	MINI_Neural	64.51	-16.29	REG_50	HsaEX0066666	58.33	98.43
camsap1a	DreEX0018704	chr21:4573926-4573958	33	chr21:4576211,4573926-4573958,4568232	C1	MINI_Neural	75.97	3.03	REG_50	HsaEX0012280	60.47	9.98
mark3a	DreEX0045084	chr13:15534847-15534891	45	chr13:15530695,15534847-15534891,15536593	C3	MINI_Neural	70.65	-19.52	REG_50	HsaEX0037926	55.29	57.49
ccdc149b	DreEX0019436	chr1:39328978-39329010	33	chr1:39328835,39328978-39329010,39329149	S	MINI_Neural	92.57	-28.71	REG_50	HsaEX0013076	76.79	79.24
synj1	DreEX0076897	chr10:26592880-26592918	39	chr10:26591352,26592880-26592918,26596868	C2	MINI_Neural	31.97	-28.13	REG_50	HsaEX0063209	69.54	79.6
synj1	DreEX0076899	chr10:26594740-26594778	39	chr10:26591352,26594740-26594778,26596868	C1	MINI_Neural	75.8	-59.82	REG_50	HsaEX0063211	77.9	85.27
asph	DreEX0015309	chr2:27006647-27006691	45	chr2:27006537,27006647-27006691,27008726	S	MINI_Neural	50.54	-28.22	REG_50	HsaEX0006332	65.17	94.24
nfasca	DreEX0050371	chr11:23607735-23607764	30	chr11:23607479,23607735-23607764,23630270	C1	MINI_Neural	26.15	-1.67	REG_50	HsaEX0042666	58.81	NA
tpd52	DreEX0080763	chr19:32348976-32349017	42	chr19:32344875,32348976-32349017,32351232	S	MINI_Neural	53.53	-32.5	REG_50	HsaEX0066658	90.95	97.18
adgrl2a	DreEX0011665	chr11:7671706-7671744	39	chr11:7663968,7671706-7671744,7674449	S	MINI_Neural	70.92	-14.71	REG_50	HsaEX0036237	52.24	86.61
itpr1b	DreEX0040341	chr11:35636928-35636963	36	chr11:35638723,35636928-35636963,35618124	C2	MINI_Neural	75.2	-29.07	REG_50	HsaEX0032565	96.02	2.49
itpr1b	DreEX0040342	chr11:35625862-35625897	36	chr11:35638723,35625862-35625897,35622964	C2	MINI_Neural	76.16	-5.42	REG_50	HsaEX0032566	94.27	20.33
dlg3	DreEX0027241	chr14:32740244-32740289	46	chr14:32743155,32740244-32740289,32735549	C3	MINI_Neural	91.19	-27.81	REG_50	HsaEX0019896	76.66	3.41
exoc7	DreEX0031140	chr12:46733996-46734034	39	chr12:46730786,46733996-46734034,46735211	S	MINI_Neural	69.34	-24.9	REG_50	HsaEX0023501	69.53	30.24
camsap2a	DreEX6099100	chr22:22341579-22341611	33	chr22:22347603,22341579-22341611,22340802	ANN	MINI_Neural	86.59	-4.76	REG_50	HsaEX0012290	66.36	88.78
dnm1l	DreEX0027768	chr25:20152612-20152647	36	chr25:20155317,20152612-20152647,20152123	S	MINI_Neural	30.76	-2.31	REG_25	HsaEX0020445	47.01	-0.39
ptch1	DreEX0059175	chr8:30053204-30053232	29	chr8:30042895,30053204-30053232,30053355	S	MINI_Neural	34.73	-26.16	REG_25	HsaEX1029868	27.08	NA
BRD8 (2 of 2)	DreEX0000863	chr21:30197811-30197855	45	chr21:30195615,30197811-30197855,30199733	S	MINI_Neural	63.5	-31.25	REG_25	HsaEX0008424	45.78	9.54
rap1gap2a	DreEX0060788	chr15:29355114-29355146	33	chr15:29353249,29355114-29355146,29359278	S	MINI_Neural	90.28	-45.57	REG_25	HsaEX0052222	40.17	NA
pleca	DreEX0056138	chr19:22881438-22881473	36	chr19:22882039,22881438-22881473,22879326	S	MINI_Neural	35.48	-6.45	REG_25	HsaEX0048199	45.51	83.17
edem3	DreEX0028917	chr8:19442054-19442101	48	chr8:19442284,19442054-19442101,19440119+19440125	S	MINI_Neural	71.21	-16.17	REG_25	HsaEX0021585	49.67	94.21
PQLC1	DreEX0007052	chr19:11493897-11493941	45	chr19:11489157,11493891+11493897-11493941,11520506	S	MINI_Neural	84.64	-25.5	REG_25	HsaEX0049865	33.88	20.7
add1	DreEX0011514	chr21:1970308-1970341	34	chr21:1971044,1970308-1970341,1965370	S	MINI_Neural	46.31	-21.47	REG_25	HsaEX0002792	45.43	89.5
camta1b	DreEX0018740	chr11:39652644-39652674	31	chr11:39652319,39652644-39652674,39658054	C1	MINI_Neural	48.35	-21.58	REG_25	HsaEX0012297	26.61	46.23
brd8	DreEX0017331	chr14:7431020-7431064	45	chr14:7418945,7431020-7431064,7432962	C3	MINI_Neural	63.14	-3.39	REG_25	HsaEX0008424	45.78	9.54
wnk1b	DreEX0085368	chr4:8049529-8049570	42	chr4:8055250,8049529-8049570,8043959	C1	MINI_Neural	33.27	-12.21	REG_25	HsaEX0071558	29.55	5.36
clta	DreEX0022247	chr1:11673354-11673389	36	chr1:11668454,11673354-11673389,11674417	C2	MINI_Neural	70.88	-25.15	REG_25	HsaEX1009053	31.54	4.07
camk2g2	DreEX0018641	chr13:22084669-22084701	33	chr13:22084078,22084669-22084701,22093084	C3	MINI_Neural	41.81	-14.6	REG_25	HsaEX0012230	43.81	7.22
ccser2a	DreEX0019867	chr17:26471297-26471336	40	chr17:26473406,26471297-26471336,26463482	C1	MINI_Neural	53.88	-6.41	REG_25	HsaEX0024310	46.14	11.05
epb41a	DreEX0030176	chr19:13824084-13824122	39	chr19:13826677+13826752,13824084-13824122,13814807	C3	MINI_Neural	60.09	1.93	REG_25	HsaEX0022624	30.92	32.11
ptprfa	DreEX0059613	chr6:3075494-3075526	33	chr6:3070002,3075494-3075526,3076051	S	MINI_Neural	30.58	-3.09	REG_25	HsaEX0051140	41.02	5.54
KIF21B	DreEX0005387	chr11:2873528-2873566	39	chr11:2866060,2873528-2873566,2888906	S	MINI_Neural	62.19	-8.53	REG_25	HsaEX0034523	29.96	NA
ablim3	DreEX0010412	chr14:34326427-34326477	51	chr14:34330356,34326427-34326477,34317862	C2	MINI_Neural	63.91	-17.94	REG_25	HsaEX0000740	28.51	NA
ccser2b	DreEX0019869	chr12:12930362-12930401	40	chr12:12933185,12930362-12930401,12917503	C3	MINI_Neural	81.32	NA	REG_25	HsaEX0024310	46.14	11.05
tpd52l1	DreEX0080768	chr20:39792258-39792296	39	chr20:39799084,39792258-39792296,39790875	S	MINI_Neural	47.71	-22.27	REG_15	HsaEX0066661	17.01	6.57
zdhhc20a	DreEX0086286	chr10:35626419-35626454	36	chr10:35623742,35626419-35626454,35627263	S	MINI_Neural	55.25	-46.79	REG_15	HsaEX0072500	17.58	77.9
zdhhc20b	DreEX0086292	chr24:24850215-24850250	36	chr24:24853702,24850215-24850250,24850050	S	MINI_Neural	55.43	-20.51	REG_15	HsaEX0072500	17.58	77.9
elmo1	DreEX0029709	chr19:34373563-34373604	42	chr19:34376605,34373563-34373604,34373435	S	MINI_Neural	64.97	-29.65	REG_15	HsaEX0022145	24.17	NA
ank2b	DreEX0013091	chr7:57649863-57649898	36	chr7:57650205,57649863-57649898,57646763	S	MINI_Neural	53.53	-25.23	NO_REG	HsaEX0004131	10.93	3.5
mapk8ip3	DreEX0044941	chr3:15831529-15831567	39	chr3:15831030,15831529-15831567,15834427	S	MINI_Neural	72.77	-10.95	NO_REG	HsaEX0037797	0.73	2.7
sos1	DreEX0074539	chr11:45084982-45085026	45	chr11:45083942,45084982-45085026,45085458	S	MINI_Neural	61.54	-9.85	NO_REG	HsaEX0061044	-48.94	10.68
stxbp5a	DreEX0076323	chr20:31860938-31860985	48	chr20:31864229,31860938-31860985,31858272	C1	MINI_Neural	76.72	-2.54	NO_REG	HsaEX0062776	-28.78	-2.45
cadps2	DreEX0018377	chr25:27810831-27810863	33	chr25:27810720,27810831-27810863,27823324	S	MINI_Neural	80.55	-9.6	NO_REG	HsaEX0012137	-2.56	10.82
abcc9	DreEX0010129	chr4:14688902-14688940	39	chr4:14686095,14688902-14688940,14690609	C1	MINI_Neural	51.45	-15.75	NO_REG	HsaEX0000527	6.85	NA
abcc9	DreEX0010130	chr4:14689582-14689617	36	chr4:14686095,14689582-14689617,14690609	C2	MINI_Neural	55.16	-20.89	NO_REG	HsaEX0000527	6.85	NA
ift88	DreEX0038814	chr9:21558503-21558550	48	chr9:21561926,21558503-21558550,21555496	C1	MINI_Neural	71.41	-23.01	NO_REG	HsaEX6039462	0.07	0
slain2	DreEX0071878	chr20:23550973-23551011	39	chr20:23554441,23550973-23551011,23549069	C2	MINI_Neural	45.23	-19.05	NO_REG	HsaEX6084260	-0.05	0.34
CPEB2	DreEX0003079	chr23:2215390-2215440	51	chr23:2208532,2215390-2215440,2219290	C2	MINI_Neural	59.24	-24	NO_REG	HsaEX6083617	0.57	-2.9
nfia	DreEX0050421	chr22:16858736-16858786	51	chr22:16862941,16858736-16858786,16836708	C1	MINI_Neural	59.81	-11.7	NO_REG	HsaEX0042726	0.07	-0.03
baiap2a	DreEX0016551	chr3:51627188-51627225	38	chr3:51624709,51627188-51627225,51637017	S	MINI_Neural	87.28	-31.37	NO_REG	HsaEX6025366	0.21	0
UNC13B (2 of 2)	DreEX0009271	chr10:16989609-16989638	30	chr10:16988825,16989609-16989638,16990662	S	MINI_Neural	61.32	-31.92	NO_REG	HsaEX0069348	9.96	0.54
si:dkey-71h2.2	DreEX0070910	chr20:19381472-19381497	26	chr20:19387628,19381463+19381472-19381497+19381500,19378700	S	MINI_Neural	76.18	-24.59	NO_G_ORTH	NA	NA	NA
tpd52l2a	DreEX0080777	chr8:23185662-23185706	45	chr8:23185156,23185662-23185706,23188997	C3	MINI_Neural	78.73	-34.58	NO_G_ORTH	NA	NA	NA
si:ch1073-219n12.1	DreEX0066260	chr9:3111939-3111983	45	chr9:3107380,3111939-3111983,3113190	C1	MINI_Neural	38.21	-13.64	NO_G_ORTH	NA	NA	NA
si:ch211-236g6.1	DreEX0067813	chr22:9778739-9778785	47	chr22:9778622,9778739-9778785,9778949	S	MINI_Neural	43.56	-19.62	NO_G_ORTH	NA	NA	NA
rimbp2	DreEX0062205	chr8:43952697-43952729	33	chr8:43955473,43952697-43952729,43950952	S	MINI_Neural	25.97	-55.66	NO_EV_ORTH	NA	NA	NA
ldlrap1a	DreEX0042771	chr19:29772852-29772883	32	chr19:29771119,29772852-29772883,29775942	S	MINI_Neural	41.53	-6.74	NO_EV_ORTH	NA	NA	NA
dgkza	DreEX0026704	chr7:38835721-38835765	45	chr7:38831863,38835721-38835765,38836597	S	MINI_Neural	56.52	3.5	NO_EV_ORTH	NA	NA	NA
ikbkg	DreEX0039067	chr23:18660182-18660229	48	chr23:18660418,18660182-18660229,18658013	S	MINI_Neural	81.68	-18.42	NO_EV_ORTH	NA	NA	NA
trioa	DreEX0081318	chr19:42299927-42299956	30	chr19:42303274,42299927-42299956,42299813	S	MINI_Neural	85.53	-51.68	NO_EV_ORTH	NA	NA	NA
mpx	DreEX0047271	chr10:7821540-7821577	38	chr10:7821813,7821540-7821577,7821219	S	MINI_Neural	27.72	-31.36	NO_EV_ORTH	NA	NA	NA
epb41l3b	DreEX0030211	chr2:58074096-58074137	42	chr2:58076300,58074096-58074137,58065194	S	MINI_Neural	52.92	-10.13	NO_EV_ORTH	NA	NA	NA
golt1ba	DreEX0035523	chr4:16801843-16801877	35	chr4:16800559,16801843-16801877,16802626	S	MINI_Neural	49.93	-24.43	NO_EV_ORTH	NA	NA	NA
gbf1	DreEX0034448	chr13:7350444-7350479	36	chr13:7348780,7350444-7350479,7355453	S	MINI_Neural	47.86	-45.95	NO_EV_ORTH	NA	NA	NA
slc38a3a	DreEX0072778	chr11:34597349-34597381	33	chr11:34594517,34597349-34597381,34597610	S	MINI_Neural	51.65	-37.67	NO_EV_ORTH	NA	NA	NA
zfyve21	DreEX0086466	chr13:43522490-43522540	51	chr13:43517044,43522490-43522540,43522885	S	MINI_Neural	67.34	-7.16	NO_EV_ORTH	NA	NA	NA
rasgef1ba	DreEX0060999	chr5:39176518-39176568	51	chr5:39189085,39176518-39176568,39131792	S	MINI_Neural	43.79	-0.42	NO_EV_ORTH	NA	NA	NA
camkk1a	DreEX0018664	chr5:30828255-30828302	48	chr5:30819738,30828255-30828302,30831462	S	MINI_Neural	77.02	-21.25	NO_EV_ORTH	NA	NA	NA
frs2b	DreEX0033568	chr25:34228611-34228639	29	chr25:34228809,34228611-34228639,34225977	S	MINI_Neural	43.56	-36.68	NO_EV_ORTH	NA	NA	NA
rnf34a	DreEX0062692	chr8:40195641-40195682	42	chr8:40192825,40195641-40195682,40200781	S	MINI_Neural	35.73	-6.77	NO_EV_ORTH	NA	NA	NA
adam17a	DreEX0011114	chr17:35305543-35305582	40	chr17:35308250,35305543-35305582,35302560	S	MINI_Neural	40.31	-9.58	NO_EV_ORTH	NA	NA	NA
tnfaip2a	DreEX0080103	chr20:18770002-18770046	45	chr20:18762141,18770002-18770046,18772438	S	MINI_Neural	36.1	-11.63	NO_EV_ORTH	NA	NA	NA
CASKIN2 (1 of 2)	DreEX0002344	chr12:20650386-20650427	42	chr12:20648706,20650386-20650427,20650694	S	MINI_Neural	26.64	-16.84	NO_EV_ORTH	NA	NA	NA
gtpbp1	DreEX0036622	chr3:33324387-33324425	39	chr3:33324136,33324387-33324425,33326963	S	MINI_Neural	83.37	-38.87	NO_EV_ORTH	NA	NA	NA
aplp2	DreEX0013923	chr18:44393189-44393224	36	chr18:44394852,44393189-44393224,44383978	S	MINI_Neural	78.56	-24.76	NO_EV_ORTH	NA	NA	NA
trim62	DreEX0081285	chr11:40086255-40086299	45	chr11:40086420,40086255-40086299,40083699	S	MINI_Neural	28.57	-28.16	NO_EV_ORTH	NA	NA	NA
nfixb	DreEX0050435	chr3:14867376-14867411	36	chr3:14865239,14867376-14867411,14870655	S	MINI_Neural	51.3	-10.9	NO_EV_ORTH	NA	NA	NA
nhsa	DreEX0050573	chr23:41319916-41319963	48	chr23:41316872,41319916-41319963,41327902	S	MINI_Neural	46.79	-19.07	NO_EV_ORTH	NA	NA	NA
stac	DreEX0075676	chr17:24748509-24748538	30	chr17:24739312+24739316,24748509-24748538,24751567	S	MINI_Neural	70.14	-34.04	NO_EV_ORTH	NA	NA	NA
USP31	DreEX0009287	chr3:47244461-47244499	39	chr3:47244681,47244461-47244499,47244371	S	MINI_Neural	50.24	-15.57	NO_EV_ORTH	NA	NA	NA
larp4ab	DreEX0042600	chr6:39644483-39644524	42	chr6:39645081,39644483-39644524,39643127	S	MINI_Neural	45.65	8.1	NO_EV_ORTH	NA	NA	NA
slc4a11	DreEX0073023	chr13:13707903-13707935	33	chr13:13693793,13707903-13707935,13715369	S	MINI_Neural	87.04	-10.62	NO_EV_ORTH	NA	NA	NA
ERC1 (3 of 3)	DreEX0004029	chr4:8306919-8306951	33	chr4:8303397,8306919-8306951,8314344	S	MINI_Neural	55.39	-10.02	NO_EV_ORTH	NA	NA	NA
tanc1a	DreEX0077219	chr6:11809471-11809500	30	chr6:11812423,11809471-11809500,11809377	S	MINI_Neural	86.01	-30.47	NO_EV_ORTH	NA	NA	NA
tjp1a	DreEX0078961	chr7:30829859-30829894	36	chr7:30824775,30829859-30829894,30833748	S	MINI_Neural	26.82	0	NO_EV_ORTH	NA	NA	NA
rabl6b	DreEX0060428	chr5:26212654-26212683	30	chr5:26211351,26212654-26212683,26213515	S	MINI_Neural	87.34	-67.15	NO_EV_ORTH	NA	NA	NA
larp4aa	DreEX0042593	chr23:27593167-27593208	42	chr23:27595044,27593167-27593208,27592040	S	MINI_Neural	51.85	-19.61	NO_EV_ORTH	NA	NA	NA
cep131	DreEX0020837	chr12:36169895-36169924	30	chr12:36170260,36169895-36169924,36166793	S	MINI_Neural	76.98	-15.9	NO_EV_ORTH	NA	NA	NA
TANC1 (2 of 2)	DreEX0008656	chr9:52478748-52478777	30	chr9:52483191,52478735+52478748-52478777,52478638	S	MINI_Neural	57.68	-20.91	NO_EV_ORTH	NA	NA	NA
LRP1 (2 of 2)	DreEX0005588	chr11:1858787-1858816	30	chr11:1858644,1858787-1858816,1864039	S	MINI_Neural	30.74	-2.3	NO_EV_ORTH	NA	NA	NA
FKBP15 (2 of 2)	DreEX0004311	chr8:52582710-52582742	33	chr8:52584818,52582710-52582742,52579079	S	MINI_Neural	73.4	-18.63	NO_EV_ORTH	NA	NA	NA
PRKCA (2 of 2)	DreEX0007085	chr3:56218797-56218826	30	chr3:56216733,56218797-56218826,56225712	S	MINI_Neural	36.83	-5.04	NO_EV_ORTH	NA	NA	NA
ndfip1l	DreEX0049768	chr21:36250300-36250350	51	chr21:36250832,36250300-36250350,36246747	S	MINI_Neural	59.41	-34.3	NO_EV_ORTH	NA	NA	NA
osbp	DreEX0052713	chr1:52053753-52053791	39	chr1:52053633+52053654,52053753-52053791,52064183	C3	MINI_Neural	75.47	-19.18	NO_EV_ORTH	NA	NA	NA
osbp	DreEX0052716	chr1:52059959-52059988	30	chr1:52053791,52059959-52059988,52064183	C3	MINI_Neural	31.84	-9.34	NO_EV_ORTH	NA	NA	NA
RHOU (1 of 2)	DreEX0007502	chr1:53325568-53325597	30	chr1:53326366,53325568-53325597,53323769	C1	MINI_Neural	30.71	-3.86	NO_EV_ORTH	NA	NA	NA
myo3a	DreEX0048688	chr24:6160983-6161024	42	chr24:6163016,6160983-6161024,6155874	C2	MINI_Neural	51.83	-22.84	NO_EV_ORTH	NA	NA	NA
osbpl7	DreEX0052801	chr12:28673436-28673477	42	chr12:28673559,28673436-28673477,28672413	S	MINI_Neural	36.19	-20.31	NO_EV_ORTH	NA	NA	NA
cadps2	DreEX0018374	chr25:27791197-27791226	30	chr25:27779078,27791197-27791226,27796877	C2	MINI_Neural	91.89	-31.5	NO_EV_ORTH	NA	NA	NA
grip1	DreEX0036251	chr4:13043044-13043082	39	chr4:13046084,13043044-13043082,13042764	S	MINI_Neural	49.58	-21.47	NO_EV_ORTH	NA	NA	NA
mical3a	DreEX0046454	chr18:10930315-10930365	51	chr18:10927746,10930315-10930365,10945569	C2	MINI_Neural	35.45	-6.48	NO_EV_ORTH	NA	NA	NA
ift88	DreEX0038813	chr9:21558852-21558896	45	chr9:21561926,21558852-21558896,21555496	C1	MINI_Neural	69.55	-35.09	NO_EV_ORTH	NA	NA	NA
eef1db	DreEX0029001	chr20:52744332-52744375	44	chr20:52740652,52744332-52744375,52756000	C1	MINI_Neural	43.4	-9.17	NO_EV_ORTH	NA	NA	NA
cnksr1	DreEX0022437	chr17:26989219-26989248	30	chr17:26989530,26989219-26989248,26987138	S	MINI_Neural	25.21	-31.64	NO_EV_ORTH	NA	NA	NA
ano5b	DreEX0013477	chr7:32612900-32612944	45	chr7:32624201,32612900-32612944,32609409	S	MINI_Neural	32.77	-5.69	NO_EV_ORTH	NA	NA	NA
dnajc5ga	DreEX0027677	chr20:38865314-38865352	39	chr20:38867567,38865314-38865352,38863029	C3	MINI_Neural	82.66	-55.06	NO_EV_ORTH	NA	NA	NA
tpd52l1	DreEX0080769	chr20:39831796-39831837	42	chr20:39833262,39831796-39831837,39815130	C1	MINI_Neural	44.5	-21.38	NO_EV_ORTH	NA	NA	NA
camk2d1	DreEX0018603	chr7:57560005-57560049	45	chr7:57546098,57560005-57560049,57561669	S	MINI_Neural	56.71	-15.7	NO_EV_ORTH	NA	NA	NA
bin1b	DreEX0016944	chr6:6866292-6866327	36	chr6:6868024,6866292-6866327,6863775	S	MINI_Neural	41.97	-25.38	NO_EV_ORTH	NA	NA	NA
gphna	DreEX0035711	chr17:34176893-34176934	42	chr17:34162243,34176893-34176934,34188878	C2	MINI_Neural	38.27	11.1	NO_EV_ORTH	NA	NA	NA
EPB41L2	DreEX0003958	chr20:2284026-2284061	36	chr20:2284168,2284026-2284061,2268975	C3	MINI_Neural	50	-16.13	NO_EV_ORTH	NA	NA	NA
elna	DreEX0029759	chr15:367263-367304	42	chr15:368474,367263-367304,365984	S	MINI_Neural	43.87	-10.23	NO_EV_ORTH	NA	NA	NA
osbp	DreEX0052712	chr1:52058783-52058821	39	chr1:52055892,52058783-52058821,52059959	C3	MINI_Neural	39.38	39.65	NO_EV_ORTH	NA	NA	NA
si:dkey-14d8.2	DreEX0069355	chr4:5376731-5376762	32	chr4:5375727,5376731-5376762,5377467	C1	MINI_Neural	37.65	0	NO_EV_ORTH	NA	NA	NA
prcp	DreEX0057974	chr15:11304774-11304816	43	chr15:11308077,11304774-11304816,11304489	C3	MINI_Neural	42.7	NA	NO_EV_ORTH	NA	NA	NA
ldlrap1b	DreEX0042776	chr13:45463264-45463295	32	chr13:45471138,45463264-45463295,45459531	S	MINI_Neural	59.23	2.45	NO_EV_ORTH	NA	NA	NA
DNAH10	DreEX0003636	chr5:27738312-27738351	40	chr5:27738211,27738312-27738351,27740154	S	MINI_Neural	33.98	NA	NO_EV_ORTH	NA	NA	NA
arhgap27	DreEX0014296	chr12:4976881-4976931	51	chr12:4971453,4976881-4976931,4985795	C3	MINI_Neural	25.9	-6.63	NO_EV_ORTH	NA	NA	NA
pl10	DreEX0055942	chr6:59910246-59910296	51	chr6:59909489,59910246-59910296,59912958	ANN	MINI_Neural	58.82	-15.5	NO_EV_ORTH	NA	NA	NA
nt5c2a	DreEX6061652	chr13:28541078-28541116	39	chr13:28541924,28541078-28541116,28538501	ANN	MINI_Neural	71.74	-34.27	NO_EV_ORTH	NA	NA	NA
tapt1a	DreEX0077295	chr14:47670791-47670823	33	chr14:47673048,47670791-47670823,47664504	ANN	MINI_Neural	60.7	-24.82	NO_EV_ORTH	NA	NA	NA
tenm1	DreEX0078160	chr5:20883997-20884026	30	chr5:20889559,20883997-20884026,20883861	S	MINI_Neural	81.98	-13.34	NO_COV	HsaEX0044629	NA	NA
atp2b1b	DreEX0015813	chr25:19529688-19529720	33	chr25:19530412,19529688-19529720,19527081	S	MINI_Neural	27.55	-17.89	NO_COV	HsaEX0006893	NA	NA
iqsec2	DreEX0039805	chr8:36936761-36936810	50	chr8:36931819,36936761-36936810+36936831,36941595+36941609+36941612	S	MINI_Neural	79.2	-4.69	NO_COV	HsaEX0032165	NA	NA
erc2	DreEX0030596	chr11:37073908-37073943	36	chr11:37075774,37073908-37073943,37070328+37070331	S	MINI_Neural	36.97	-2.31	NO_COV	HsaEX0022989	NA	NA
dlg3	DreEX0027239	chr14:32741429-32741458	30	chr14:32743155,32741429-32741458,32740289	C3	MINI_Neural	26.73	-13.58	NO_COV	HsaEX6052187	NA	NA
itsn2a	DreEX0040396	chr20:25482773-25482853	81	chr20:25485075,25482773-25482853,25480806	S	LONG_Neural	69.71	-21.6	REG_50	HsaEX0032631	58.72	0
cers5	DreEX0021077	chr22:5731135-5731264	130	chr22:5732101+5732167,5731135-5731264,5728900	S	LONG_Neural	57.77	-5.16	REG_50	HsaEX0035443	72.95	0.32
ralgapa2	DreEX0060633	chr17:41658961-41659104	144	chr17:41666914,41658961-41659104,41655403	S	LONG_Neural	91.05	-6.25	REG_50	HsaEX1030541	73.15	1.75
CR388002.1	DreEX0003172	chr1:13438339-13438437	99	chr1:13433933,13438339-13438437,13438845	S	LONG_Neural	80.78	-23.59	REG_50	HsaEX0004132	53.64	87.29
tnikb	DreEX0080186	chr24:26399925-26400011	87	chr24:26404274,26399925-26400011,26396753	S	LONG_Neural	74.48	-10.23	REG_50	HsaEX0066239	81.86	37.95
DENND1A	DreEX0003530	chr21:8371358-8371486	129	chr21:8369570,8371358-8371486,8376264	S	LONG_Neural	73.31	-14.5	REG_50	HsaEX0019090	61.27	1.4
mark4a	DreEX0045109	chr5:36218796-36218878	83	chr5:36210141,36218796-36218878,36219264	S	LONG_Neural	77.08	-0.51	REG_50	HsaEX0037942	75.52	0
MARK4 (2 of 2)	DreEX0005820	chr15:23694785-23694867	83	chr15:23692386,23694785-23694867,23702150+23702158	S	LONG_Neural	83.44	-23.18	REG_50	HsaEX0037942	75.52	0
kif1b	DreEX0041534	chr23:29505374-29505625	252	chr23:29506300,29505374-29505625,29500487	S	LONG_Neural	78.45	-1.59	REG_50	HsaEX0034477	70.53	-5.71
ank2b	DreEX0013090	chr7:57636791-57636889	99	chr7:57646539,57636791-57636889,57636102	S	LONG_Neural	82.95	-20.36	REG_50	HsaEX0004132	53.64	87.29
ehbp1	DreEX0029229	chr17:24159974-24160066	93	chr17:24158804,24159974-24160066,24160738	S	LONG_Neural	76.19	-17.1	REG_50	HsaEX0021830	71.6	0.28
atp2b4	DreEX0015852	chr11:22691699-22691900	202	chr11:22697864,22691699-22691900,22673923	S	LONG_Neural	73.67	-7.42	REG_50	HsaEX0006882	61.83	0
CLTB	DreEX0002855	chr14:45875400-45875453	54	chr14:45879306,45875400-45875453,45872893	S	LONG_Neural	57.49	-11.62	REG_50	HsaEX0015811	82.52	1.41
mtss1	DreEX0047992	chr6:50594014-50594136	123	chr6:50594826,50594014-50594136,50591467	S	LONG_Neural	44.2	-16.31	REG_50	HsaEX0040732	65.98	0
ablim1a	DreEX0010378	chr13:43392348-43392431	84	chr13:43393059,43392348-43392431,43386659	S	LONG_Neural	30.26	-20.66	REG_50	HsaEX0000722	61	5.74
smg7	DreEX0073870	chr2:36088209-36088358	150	chr2:36085475,36088209-36088358,36089920	S	LONG_Neural	83.27	-15.28	REG_50	HsaEX0060477	62.1	-0.43
arhgef7b	DreEX0014628	chr1:45325340-45325510	171	chr1:45323688,45325340-45325510,45327621	S	LONG_Neural	66.23	-11.62	REG_50	HsaEX0005734	76.61	0.61
pip5k1ca	DreEX0055690	chr22:17519074-17519163	90	chr22:17525611,17519074-17519163,17518988	S	LONG_Neural	27.7	-0.69	REG_50	HsaEX0047695	55.09	19.43
ralgapa1	DreEX0060615	chr17:12662498-12662638	141	chr17:12659305,12662498-12662638,12664498	S	LONG_Neural	61.98	-3.62	REG_50	HsaEX1030525	82.68	NA
wdfy3	DreEX0084871	chr5:39542283-39542366	84	chr5:39543213,39542283-39542366,39540931+39540934	S	LONG_Neural	65.95	-11.04	REG_50	HsaEX0070918	52.85	-15.53
tnrc6a	DreEX0080401	chr3:35390331-35390489	159	chr3:35389610,35390331-35390489,35390593	S	LONG_Neural	40.75	-4.31	REG_50	HsaEX0066372	58.02	5.24
cstf2	DreEX0024691	chr14:41008717-41008776	60	chr14:41011152,41008717-41008776,41002432	S	LONG_Neural	74.53	-32.7	REG_50	HsaEX0017620	69.51	89.47
stard9	DreEX0075816	chr17:38578543-38578620	78	chr17:38578423,38578543-38578620,38579034	S	LONG_Neural	38.46	8.7	REG_50	HsaEX0062309	81.53	NA
UNC13B (2 of 2)	DreEX0009265	chr10:17056586-17056642	57	chr10:17056354,17056586-17056642,17058936	S	LONG_Neural	38.66	-17.69	REG_50	HsaEX0069340	66.53	24.27
agap2	DreEX0011974	chr23:36565415-36565474	60	chr23:36565699,36565415-36565474,36561359	S	LONG_Neural	92.44	-54.23	REG_50	HsaEX0003028	80.64	16.67
magi3a	DreEX0044380	chr23:26311981-26312081	101	chr23:26314277,26311981-26312081,26306353	S	LONG_Neural	60.39	-8.98	REG_50	HsaEX0037286	76.61	-9.63
stx3a	DreEX0076245	chr14:21442609-21442719	111	chr14:21442461+21442483,21442609-21442719,21452470	C3	LONG_Neural	38.24	-37.02	REG_50	HsaEX0062706	67.29	26.68
sorbs2a	DreEX0074454	chr1:17068178-17069845	1668	chr1:17070304,17068178-17069845,17067398	S	LONG_Neural	76.52	-26.88	REG_50	HsaEX0060988	57.78	19.45
madd	DreEX0044314	chr7:34068639-34068695	57	chr7:34070186,34068639-34068695,34065858	C2	LONG_Neural	65.52	-55.52	REG_50	HsaEX0037217	80.28	60.69
madd	DreEX0044319	chr7:34061675-34061737	63	chr7:34062245,34061675-34061737,34060663	S	LONG_Neural	88.6	-6.81	REG_50	HsaEX0037224	89.48	87.73
arhgef7a	DreEX0014608	chr9:21752977-21753147	171	chr9:21752572,21752977-21753147,21754774	S	LONG_Neural	85.94	-1.13	REG_50	HsaEX0005734	76.61	0.61
atp11a	DreEX0015647	chr1:45584782-45584871	90	chr1:45591497,45584782-45584871,45580756	C3	LONG_Neural	52.71	0	REG_50	HsaEX0006764	69.28	19.93
rapgef1b	DreEX0060826	chr21:4026422-4026583	162	chr21:4023746,4026422-4026583,4036128	C1	LONG_Neural	83.56	-24.22	REG_50	HsaEX0052250	78.63	2.86
fat1a	DreEX0032182	chr1:16826935-16826994	60	chr1:16822270,16826935-16826994,16828901	C2	LONG_Neural	64.02	-30.1	REG_50	HsaEX6087239	80.98	NA
pou2f2a	DreEX0057184	chr16:11096068-11096141	74	chr16:11094130,11096068-11096141,11096357	C1	LONG_Neural	81.42	-12.5	REG_50	HsaEX0049234	50.9	NA
kansl3	DreEX0040725	chr8:51329824-51329901	78	chr8:51332548,51329824-51329901,51327694	S	LONG_Neural	70.57	-11.06	REG_50	HsaEX0034003	76.88	-0.13
atp11c	DreEX0015658	chr14:32175390-32175480	91	chr14:32178436,32175390-32175480,32170027	C2	LONG_Neural	59.55	-11.66	REG_50	HsaEX0006798	54.2	14.51
slc8a1b	DreEX0073316	chr17:22451807-22451913	107	chr17:22363234,22451807-22451913,22457078	C3	LONG_Neural	76.37	-14.25	REG_50	HsaEX0060009	89.25	NA
rapgef1a	DreEX0060808	chr8:11765739-11765903	165	chr8:11774265,11765739-11765903,11756991	C2	LONG_Neural	80.86	-4.38	REG_50	HsaEX0052250	78.63	2.86
ablim1b	DreEX0010386	chr12:30086076-30086168	93	chr12:30085867,30086076-30086168,30089914	C1	LONG_Neural	61.08	-10.32	REG_50	HsaEX0000722	61	5.74
ablim1b	DreEX0010387	chr12:30089519-30089611	93	chr12:30085867,30089519-30089611,30089914	C1	LONG_Neural	69.04	-22.46	REG_50	HsaEX0000722	61	5.74
clta	DreEX0022246	chr1:11670483-11670536	54	chr1:11668454,11670483-11670536,11674417	C1	LONG_Neural	89.62	-31.98	REG_50	HsaEX0015809	61	21.94
plekha5	DreEX0056207	chr4:3042626-3042679	54	chr4:3049850,3042626-3042679,3035818+3035821	C2	LONG_Neural	76.27	-17.96	REG_50	HsaEX0048258	55.41	13.82
plekha5	DreEX0056208	chr4:3040720-3040800	81	chr4:3049850,3040720-3040800,3035818+3035821	C2	LONG_Neural	73.3	-1.05	REG_50	HsaEX0048259	50.9	0.15
ap2a1	DreEX0013724	chr3:32260327-32260389	63	chr3:32259959,32260327-32260389,32260764	C2	LONG_Neural	43.53	-23.3	REG_50	HsaEX0004919	78.89	5.65
mtmr1a	DreEX0047881	chr7:25590155-25590220	66	chr7:25588186,25590155-25590220,25592080	C2	LONG_Neural	90.7	-3.57	REG_50	HsaEX0040548	80.01	2.45
clip2	DreEX0022132	chr5:58786381-58786485	105	chr5:58784420,58786381-58786485,58792704	S	LONG_Neural	38.62	-4.41	REG_50	HsaEX0015683	73.44	NA
sorbs2b	DreEX0074475	chr14:29484305-29485843	1539	chr14:29486201,29484305-29485843,29483073	S	LONG_Neural	75.85	-69.37	REG_50	HsaEX0060988	57.78	19.45
ank3a	DreEX0013128	chr17:20699999-20705869	5871	chr17:20707002,20699999-20705869,20698008	S	LONG_Neural	75.16	-9.1	REG_50	HsaEX1003665	54.87	-0.36
SHROOM2 (2 of 2)	DreEX0007898	chr6:30443673-30443774	102	chr6:30441733+30441787,30443673-30443774,30444602	C2	LONG_Neural	63.45	-20.25	REG_50	HsaEX1036911	67.67	NA
ank3b	DreEX0013146	chr12:7624452-7630238	5787	chr12:7631318,7624452-7630238+7630244,7620986	C1	LONG_Neural	61.27	-8.49	REG_50	HsaEX1003665	54.87	-0.36
myrf	DreEX0048927	chr25:3783042-3783125	84	chr25:3783201,3783042-3783125,3781417+3781420	S	LONG_Neural	86.19	-8.37	REG_50	HsaEX0009109	64.56	NA
exoc7	DreEX0031138	chr12:46719626-46719715	90	chr12:46715861,46719626-46719715,46726150	C3	LONG_Neural	73.53	-33.87	REG_50	HsaEX0023505	60.67	-13.57
c2cd5	DreEX0017717	chr18:6509192-6509313	122	chr18:6506096,6509192-6509313+6509365+6509369,6509917	S	LONG_Neural	52.56	-21.24	REG_50	HsaEX0033684	71.45	6.35
r3hdm1	DreEX0060125	chr22:12341739-12341993	255	chr22:12336929,12341739-12341993,12342097+12342112	S	LONG_Neural	72.01	-9.27	REG_50	HsaEX0051521	74.37	8.63
CLASP1 (2 of 2)	DreEX0002808	chr11:43733538-43733645	108	chr11:43774504,43733538-43733645,43731558	C2	LONG_Neural	48.2	-9.71	REG_50	HsaEX0015475	50.02	87.79
galnt7	DreEX0034222	chr1:37436756-37436938	183	chr1:37435062,37436756-37436938,37440572	C2	LONG_Neural	49.18	-11.37	REG_50	HsaEX0026955	50.33	6.75
VPS13C	DreEX0009368	chr7:29432123-29432185	63	chr7:29440331,29432123-29432185,29431886	C3	LONG_Neural	87.09	-68.32	REG_50	HsaEX0070503	73.52	93.1
mapk8a	DreEX6061951	chr13:31029314-31029385	72	chr13:31029753,31029314-31029385,31027698	ANN	LONG_Neural	81.44	-23.28	REG_50	HsaEX0037783	65.03	72.2
VPS13C	DreEX6005581	chr7:29431818-29431886	69	chr7:29440331,29431818-29431886,29431651	ANN	LONG_Neural	90.4	-72.91	REG_50	HsaEX0070504	78.06	100
tcf12	DreEX0077778	chr7:52257738-52257809	72	chr7:52258526,52257738-52257809,52256198	S	LONG_Neural	42.41	-7.49	REG_25	HsaEX0064153	39.02	1.28
srcap	DreEX0075066	chr12:26990311-26990484	174	chr12:26990149,26990311-26990484,26992022	S	LONG_Neural	56.81	-8.04	REG_25	HsaEX0061655	40.9	0.13
vps13d	DreEX0084420	chr23:21812608-21812682	75	chr23:21814295,21812608-21812682,21810963	S	LONG_Neural	52.49	9.26	REG_25	HsaEX0070522	49.97	13.42
spna2	DreEX0074857	chr21:13081972-13082031	60	chr21:13080544,13081972-13082031,13084811	S	LONG_Neural	84.61	-19.88	REG_25	HsaEX0061552	25.83	27.45
dclk2	DreEX0025935	chr1:36540842-36540898	57	chr1:36539880,36540842-36540898,36545599	S	LONG_Neural	63.45	-24.81	REG_25	HsaEX0018696	26.1	0
nfya	DreEX0050505	chr11:36006060-36006098	39	chr11:36007678,36006024+36006027+36006060-36006098,36003830	S	LONG_Neural	50.48	-17.81	REG_25	HsaEX0042824	32.53	-5.89
ints10	DreEX0039565	chr14:708303-708371	69	chr14:705729,708303-708371,711220	S	LONG_Neural	66.17	-15.56	REG_25	HsaEX0031861	48.89	0.34
dab1a	DreEX0025614	chr20:8150604-8150681	78	chr20:8159369,8150576+8150604-8150681,8135649	S	LONG_Neural	66.9	-4.87	REG_25	HsaEX0018423	45.21	NA
myo5b	DreEX0048717	chr21:22426545-22426622	78	chr21:22429646,22426545-22426622,22423663	S	LONG_Neural	49.45	-2.01	REG_25	HsaEX0041208	34.1	4.12
dbn1	DreEX0025806	chr21:37142183-37142287	105	chr21:37144174,37142183-37142287,37128839+37128854	S	LONG_Neural	36.9	-18.89	REG_25	HsaEX0018566	29.13	-0.08
NAV2 (2 of 2)	DreEX0006266	chr7:16713193-16713258	66	chr7:16711534,16713193-16713258,16716467	S	LONG_Neural	35.66	-12.97	REG_25	HsaEX0041762	36.59	NA
socs7	DreEX0074416	chr11:12046659-12046790	132	chr11:12058147+12058321,12046659-12046790,12037882	S	LONG_Neural	50.18	0.6	REG_25	HsaEX0060944	36.78	0.27
kcnma1a	DreEX0040958	chr13:16738071-16738154	84	chr13:16734257,16738071-16738154,16740744	S	LONG_Neural	39.43	-8.15	REG_25	HsaEX0033055	32.25	0
pam	DreEX0053320	chr10:5759025-5759327	303	chr10:5744108,5759025-5759327,5763744	S	LONG_Neural	56.25	-11.64	REG_25	HsaEX0045322	32	-12.51
R3HDM2	DreEX0007212	chr6:59679090-59679173	84	chr6:59676884,59679072+59679090-59679173,59684411	S	LONG_Neural	66.36	-2.38	REG_25	HsaEX0051539	35.22	4.12
kalrna	DreEX0040668	chr9:4432076-4432171	96	chr9:4428759,4432076-4432171,4434101	S	LONG_Neural	62.55	2.89	REG_25	HsaEX0032827	40.8	NA
nfyal	DreEX0050508	chr8:25011895-25011978	84	chr8:25014468,25011892+25011895-25011978,25009638+25009644	S	LONG_Neural	45.82	-4.52	REG_25	HsaEX0042824	32.53	-5.89
cadps2	DreEX0018373	chr25:27786232-27786351	120	chr25:27779078,27786232-27786351,27796877	C2	LONG_Neural	91.02	-32.16	REG_25	HsaEX0012141	44.18	-3.19
clasp2	DreEX0021954	chr19:43199717-43199779	63	chr19:43197564,43199717-43199779,43200553	C1	LONG_Neural	72.76	5.72	REG_25	HsaEX0015504	29.66	0
myo1b	DreEX0048623	chr9:16202784-16202870	87	chr9:16203105,16202784-16202870,16196510	C2	LONG_Neural	72.92	-28.76	REG_25	HsaEX0041114	46.96	2.36
vav2	DreEX0084171	chr21:17990517-17990600	84	chr21:17992905,17990517-17990600+17990603,17990244	S	LONG_Neural	78.65	-61.8	REG_25	HsaEX0070263	49.59	0.83
plekha5	DreEX0056205	chr4:3031500-3031667	168	chr4:3032422,3031500-3031667,3028511	S	LONG_Neural	88.82	-8.48	REG_25	HsaEX0048254	45.72	-2.99
plekha5	DreEX0056206	chr4:3045306-3045425	120	chr4:3049850,3045306-3045425,3035818+3035821	C2	LONG_Neural	76.41	-18.52	REG_25	HsaEX0048257	49.31	0.78
mff	DreEX0046168	chr15:35373676-35373729	54	chr15:35388714,35373676-35373729,35373560	C2	LONG_Neural	59.8	-25.69	REG_25	HsaEX0038967	28.44	18.96
map2	DreEX0044548	chr9:39150017-39152722	2706	chr9:39138641,39150017-39152722,39157034	C3	LONG_Neural	65.12	-1.84	REG_25	HsaEX0037465	46.41	NA
map2	DreEX0044549	chr9:39152955-39153155	201	chr9:39138641,39152955-39153155,39157034	C3	LONG_Neural	64.61	-0.6	REG_25	HsaEX0037466	47.51	NA
map2	DreEX0044550	chr9:39153877-39154014	138	chr9:39138641,39153877-39154014,39157034	C2	LONG_Neural	64.13	-0.62	REG_25	HsaEX0037467	49.23	NA
dnm2a	DreEX0027784	chr3:50366168-50366306	139	chr3:50362594,50366168-50366306,50369205	C3	LONG_Neural	46.3	-7.53	REG_25	HsaEX0020457	47.97	-4.34
epb41a	DreEX0030175	chr19:13825059-13825133	75	chr19:13826677+13826752,13825059-13825133,13814807	C3	LONG_Neural	60.93	2.97	REG_25	HsaEX0022624	30.92	32.11
pbx1b	DreEX0053794	chr6:2177510-2177598	89	chr6:2180543,2177486+2177510-2177598,2175165	S	LONG_Neural	81.95	-10.6	REG_25	HsaEX0045750	43.06	-0.06
nrg1	DreEX0051570	chr10:7343839-7343897	59	chr10:7353274,7343839-7343897,7332509+7332512	C3	LONG_Neural	84.07	-22.74	REG_25	HsaEX0043800	39.95	NA
tcf7l2	DreEX0077840	chr12:30869913-30869973	61	chr12:30871518,30869913-30869973,30867281	C1	LONG_Neural	77.55	-10.25	REG_25	HsaEX0064198	34.28	96.2
dgkh	DreEX0026687	chr9:17932367-17932497	131	chr9:17928132,17932367-17932497,17944419	S	LONG_Neural	67.1	-20.33	REG_25	HsaEX0019428	25.34	-10.18
NUP54	DreEX0006423	chr21:201609-201737	129	chr21:202156,201609-201737,201129	C2	LONG_Neural	49.21	-1.47	REG_25	HsaEX0044372	38.03	8.75
sh3glb1b	DreEX6026198	chr2:16516406-16516492	87	chr2:16512976,16516406-16516492,16520616	ANN	LONG_Neural	48.25	-21.03	REG_25	HsaEX0058019	48.86	80.28
csnk1g2a	DreEX0024584	chr2:23415499-23415600	102	chr2:23413996,23415499-23415600,23417859	S	LONG_Neural	57.72	-9.03	REG_15	HsaEX0017555	23.88	33.91
clasp1a	DreEX0021917	chr9:38466634-38466774	141	chr9:38463985,38466634-38466774,38467586	S	LONG_Neural	37.33	-4.75	REG_15	HsaEX0015473	20.28	0
camk2g1	DreEX0018629	chr12:35280613-35280675	63	chr12:35283569,35280613-35280675,35268834	S	LONG_Neural	44.35	-6.99	REG_15	HsaEX0012232	20.01	-1.8
sec24b	DreEX0064848	chr14:1114762-1114872	111	chr14:1110577,1114762-1114872,1120148	S	LONG_Neural	56.05	-3.36	REG_15	HsaEX0056909	18.45	-9.22
casc4	DreEX0018992	chr7:31092810-31092896	87	chr7:31087860,31092810-31092896+31092977,31095393	S	LONG_Neural	59.91	-41.57	REG_15	HsaEX0012510	15.83	-14.09
bptf	DreEX0017245	chr3:25269106-25269276	171	chr3:25269557,25269106-25269276,25268086	S	LONG_Neural	55.81	-4.74	REG_15	HsaEX0008345	22.47	-0.81
ep400	DreEX0030152	chr8:43722912-43723031	120	chr8:43723404,43722912-43723031,43721091	S	LONG_Neural	56.26	-6.99	REG_15	HsaEX0022592	21.94	-1.89
map7d1b	DreEX0044787	chr19:4022423-4022527	105	chr19:4027468,4022423-4022527,4015015	S	LONG_Neural	70.46	-0.58	REG_15	HsaEX0037700	18.99	5.83
rab11fip3	DreEX0060153	chr24:37886365-37886478	114	chr24:37879206,37886344+37886365-37886478,37888984	S	LONG_Neural	69.63	0.18	REG_15	HsaEX0051561	24.14	-26.95
trioa	DreEX0081320	chr19:42289970-42290744	775	chr19:42295320,42289970-42290744,42288016	S	LONG_Neural	37.44	-12.99	REG_15	HsaEX1042023	18.2	13.8
wnk1b	DreEX0085367	chr4:8052239-8052331	93	chr4:8055250,8052239-8052331,8043959	C1	LONG_Neural	34.6	-9.62	REG_15	HsaEX0071551	17.5	0.11
mff	DreEX0046167	chr15:35376263-35376427	165	chr15:35388714,35376263-35376427,35373560	C2	LONG_Neural	64.58	-23.74	REG_15	HsaEX0038966	15.17	9.39
camk2g1	DreEX0018630	chr12:35259580-35259684	105	chr12:35260800+35260809,35259580-35259684,35250354	S	LONG_Neural	47.01	-12.12	REG_15	HsaEX0012233	17.73	21.07
ppip5k2	DreEX0057479	chr10:6845992-6846111	120	chr10:6850933,6845992-6846111,6827949	C1	LONG_Neural	72.8	-15.06	REG_15	HsaEX0030036	19.13	-12.73
cnnm2b	DreEX0022484	chr1:31059435-31059497	63	chr1:31057027,31059435-31059497+31059503,31061306	S	LONG_Neural	52.06	-0.45	REG_15	HsaEX0015968	23.73	-18.01
phldb1b	DreEX0055225	chr15:18037851-18037898	48	chr15:18043874,18037740+18037851-18037898,18035294	C2	LONG_Neural	60.15	-4.67	REG_15	HsaEX0047161	23.93	2.33
ebf1a	DreEX0028761	chr14:34900227-34900295	69	chr14:34897391,34900224+34900227-34900295,34905918	S	LONG_Neural	44.64	-8.95	REG_15	HsaEX0021454	20.72	NA
fnbp1b	DreEX0033190	chr21:6244132-6244227	96	chr21:6235918,6244036+6244132-6244227,6268350	C3	LONG_Neural	71.88	-21.74	REG_15	HsaEX0026116	19.96	11.58
R3HDM2	DreEX0007217	chr6:59662635-59662688	54	chr6:59659485,59662635-59662688,59674018	S	LONG_Neural	49.95	0.88	REG_15	HsaEX0051543	18.37	-0.14
celf2	DreEX0020629	chr4:24181552-24181686	135	chr4:24187773,24181552-24181686,24180278+24180281	S	LONG_Neural	58.07	4.35	NO_REG	HsaEX6087503	0.06	0.38
lats1	DreEX0042648	chr20:1233173-1233275	103	chr20:1234112,1233173-1233275,1229475	S	LONG_Neural	41.41	-3.65	NO_REG	HsaEX1019461	0.81	0.09
ppp1r13bb	DreEX0057605	chr20:20899986-20900135	150	chr20:20896784,20899986-20900135,20902987	S	LONG_Neural	63.15	-6.93	NO_REG	HsaEX0049590	-5.48	0
cacna2d1a	DreEX0018170	chr4:19782592-19782680	89	chr4:19783391,19782592-19782680,19779822	S	LONG_Neural	28.8	-24.61	NO_REG	HsaEX0012009	3.65	2.61
cdkl5	DreEX0020509	chr11:29979105-29979227	123	chr11:29978506,29979105-29979227,29981408	S	LONG_Neural	31.45	5.71	NO_REG	HsaEX0014401	-5.09	-24.94
creb3l1	DreEX0024181	chr7:38677160-38677310	151	chr7:38674777,38677160-38677310,38679180	S	LONG_Neural	38.97	-58.91	NO_REG	HsaEX6001691	0	NA
fat1a	DreEX0032175	chr1:16756671-16756739	69	chr1:16756347,16756671-16756739,16758974	S	LONG_Neural	79.99	-17.77	NO_REG	HsaEX1014238	10.82	0.77
nek1	DreEX0050140	chr20:23787288-23787374	87	chr20:23786460,23787288-23787374,23787983	S	LONG_Neural	67.17	-25.17	NO_REG	HsaEX0042475	11.27	-2.71
AKAP13 (1 of 2)	DreEX0000301	chr7:14890880-14891002	123	chr7:14894136,14890880-14891002,14889684	S	LONG_Neural	34.53	-66.89	NO_REG	HsaEX0003372	2.3	0.14
tbc1d22b	DreEX0077460	chr8:10312097-10312153	57	chr8:10302393,10312097-10312153,10312410	S	LONG_Neural	80.1	-21.99	NO_REG	HsaEX6046972	-0.14	0
taf1	DreEX0077095	chr5:35960788-35960853	66	chr5:35961347,35960788-35960853+35960892,35960411	S	LONG_Neural	60.68	-10.22	NO_REG	HsaEX7004732	0.08	0
rhbdf1a	DreEX0062029	chr3:54667067-54667171	105	chr3:54668073,54667067-54667171+54667174,54662105	S	LONG_Neural	64.27	-11.54	NO_REG	HsaEX0053445	3.48	0
osbpl3b	DreEX0052771	chr16:21548156-21548263	108	chr16:21543837,21548156-21548263,21558649	S	LONG_Neural	63.47	-17.91	NO_REG	HsaEX0044914	-32.97	-18.3
slc4a4b	DreEX0073077	chr21:5950735-5950830	96	chr21:5948313,5950735-5950830,5953467	S	LONG_Neural	65.87	-62.75	NO_REG	HsaEX1037602	6.57	9.09
hectd1	DreEX0037226	chr17:28676126-28676308	183	chr17:28675813,28676126-28676308,28676689	S	LONG_Neural	33.91	-19.02	NO_REG	HsaEX0029598	8.18	-30.13
arhgap42a	DreEX0014371	chr21:22737515-22737574	60	chr21:22737381,22737515-22737574,22740517	S	LONG_Neural	31.49	-17.95	NO_REG	HsaEX1004529	0.49	0
C3H17orf75	DreEX0001587	chr3:26208599-26208673	75	chr3:26210784,26208599-26208673,26208263	S	LONG_Neural	62.97	6.88	NO_REG	HsaEX6021974	-0.17	0
ank3a	DreEX0013117	chr17:20755674-20755700	27	chr17:20759500,20755674-20755700+20755772,20753034	S	LONG_Neural	36.31	-12.22	NO_REG	HsaEX0004148	6.8	-12.66
matn3b	DreEX0045213	chr13:32497812-32497943	132	chr13:32499514,32497812-32497943,32497510	S	LONG_Neural	55.47	-44.5	NO_REG	HsaEX6012096	0.99	NA
map4k3b	DreEX0044735	chr17:24628577-24628630	54	chr17:24628386,24628577-24628630,24631800	S	LONG_Neural	50.5	0.34	NO_REG	HsaEX6013064	-0.14	0
camk2g1	DreEX0018628	chr12:35266793-35266879	87	chr12:35268794,35266793-35266879,35263531	S	LONG_Neural	76.13	-10	NO_REG	HsaEX0012231	-28.38	-13.22
aak1b	DreEX0009773	chr10:41190612-41190911	300	chr10:41194054,41190612-41190911,41187065	S	LONG_Neural	90.35	-16.34	NO_REG	HsaEX6013762	0.1	0
nrg2a	DreEX0051576	chr21:28524886-28525110	225	chr21:28528145,28524886-28525110,28519155	S	LONG_Neural	72.97	-11.52	NO_REG	HsaEX6100176	0	0
PRDM16	DreEX0007068	chr8:48548836-48549007	172	chr8:48524873,48548836-48549007,48553054	S	LONG_Neural	45.02	-16.26	NO_REG	HsaEX0049924	-5.99	9.22
kcnma1a	DreEX0040957	chr13:16695104-16695277	174	chr13:16687478,16695104-16695277,16711346	S	LONG_Neural	34.52	-1.07	NO_REG	HsaEX0033059	11.59	NA
gapvd1	DreEX0034289	chr8:34462465-34462545	81	chr8:34464633,34462465-34462545,34458734+34458737	S	LONG_Neural	73.45	-10.72	NO_REG	HsaEX6063043	0.03	0.2
rusc2	DreEX0063765	chr5:18813410-18813587	178	chr5:18811867,18813390+18813410-18813587,18813813	S	LONG_Neural	77.42	-8.63	NO_REG	HsaEX0055997	1.55	-2
axin1	DreEX0016336	chr3:42886159-42886266	108	chr3:42889300,42886159-42886266,42883578	S	LONG_Neural	37.91	-15.46	NO_REG	HsaEX0007386	14.26	-4.15
slc4a5	DreEX0073087	chr10:45001059-45001160	102	chr10:45000071,45001059-45001160,45003535	S	LONG_Neural	50.88	-42.98	NO_REG	HsaEX6013994	0.04	NA
dzip1	DreEX0028702	chr6:7111908-7111967	60	chr6:7109218,7111908-7111967,7113113	S	LONG_Neural	59.77	-4.8	NO_REG	HsaEX0021379	10.4	5.22
madd	DreEX0044313	chr7:34070186-34070389	204	chr7:34070718,34070186-34070389,34065858	C2	LONG_Neural	74.89	-15.77	NO_REG	HsaEX6001820	0.04	0
znf395	DreEX0088162	chr20:35386509-35386588	80	chr20:35379868,35386160+35386509-35386588,35388028	C2	LONG_Neural	66.08	-24.77	NO_REG	HsaEX0024482	0.01	NA
actn1	DreEX0010935	chr13:36218967-36219052	86	chr13:36223793,36218967-36219052,36213977	C3	LONG_Neural	64.9	-1.62	NO_REG	HsaEX0002146	7.86	-0.08
dlg1	DreEX0027192	chr6:29950057-29950164	108	chr6:29940836,29950057-29950164,30007778	C3	LONG_Neural	38.97	-1.33	NO_REG	HsaEX0019879	-30.43	-17.02
abi1a	DreEX0010306	chr24:5973109-5973303	195	chr24:5967698,5973109-5973303,5979176	C3	LONG_Neural	70.04	-18.98	NO_REG	HsaEX0000643	5.31	-18.61
abi1a	DreEX0010307	chr24:5976265-5976351	87	chr24:5973303,5976265-5976351,5979176	C1	LONG_Neural	74.37	-16.88	NO_REG	HsaEX0000644	9.65	35.38
scamp2	DreEX0064334	chr25:2894022-2894148	127	chr25:2896049,2894022-2894148,2893466	S	LONG_Neural	32.89	-7.05	NO_REG	HsaEX0056356	0.09	0
camk2b1	DreEX0018577	chr5:20488037-20488109	73	chr5:20506121,20488037-20488109,20482592	C3	LONG_Neural	74.77	-6.23	NO_REG	HsaEX6007980	-0.24	0
svilb	DreEX0076651	chr2:49090488-49090571	84	chr2:49092444,49090488-49090571,49089894	C2	LONG_Neural	76.67	-18.87	NO_REG	HsaEX0063052	-27.43	-0.92
slc7a1	DreEX0073251	chr10:24511765-24511904	140	chr10:24508221,24511765-24511904,24518541	C3	LONG_Neural	58.75	-20.52	NO_REG	HsaEX6039756	-0.37	0
fat1a	DreEX0032181	chr1:16824046-16824106	61	chr1:16822270,16824046-16824106,16828901	C2	LONG_Neural	64.55	-33.52	NO_REG	HsaEX0024957	2.07	55.38
wsb1	DreEX0085445	chr15:31288834-31289005	172	chr15:31289986,31288834-31289005,31286344	S	LONG_Neural	32.99	-3.64	NO_REG	HsaEX0071632	11.45	-2.48
myo1b	DreEX0048624	chr9:16201929-16202015	87	chr9:16203105,16201929-16202015,16196510	C3	LONG_Neural	63.87	-12.95	NO_REG	HsaEX1024820	-0.46	0.4
otofa	DreEX0052869	chr20:31299646-31299744	99	chr20:31296859,31299646-31299744,31301165	C3	LONG_Neural	57.25	-8.8	NO_REG	HsaEX0021367	0.61	NA
msi2b	DreEX0047602	chr15:30586836-30586901	66	chr15:30614481,30586779+30586836-30586901,30570314	C1	LONG_Neural	39.02	-12.29	NO_REG	HsaEX6023714	0.04	0
nupl1	DreEX0052278	chr24:24866302-24866397	96	chr24:24867511,24866302-24866397,24863771	C1	LONG_Neural	33.09	-33.95	NO_REG	HsaEX6039627	-0.07	0
sh3glb2b	DreEX0066014	chr5:31064919-31064981	63	chr5:31070158,31064919-31064981,31059077	C2	LONG_Neural	38.4	-23	NO_REG	HsaEX0058034	-20.74	-8.6
wnk1b	DreEX0085364	chr4:8077855-8079138	1284	chr4:8083403,8077855-8079138,8076351	S	LONG_Neural	52.43	-23.87	NO_REG	HsaEX0071555	8.58	0.13
camk2d1	DreEX0018605	chr7:57509528-57509600	73	chr7:57498352,57509528-57509600,57529172	C3	LONG_Neural	39.09	-12.38	NO_REG	HsaEX0012226	-40.88	-7.35
rapgef1a	DreEX0060809	chr8:11762317-11762409	93	chr8:11774265,11762317-11762409,11756991	C2	LONG_Neural	48.67	-2.11	NO_REG	HsaEX0052252	4.84	0
cpt1aa	DreEX0024059	chr7:48541076-48541163	88	chr7:48538757,48541076-48541163,48542711	C3	LONG_Neural	47.48	-21.12	NO_REG	HsaEX6003481	-0.32	0
ppap2b	DreEX0057239	chr20:8004600-8004757	158	chr20:8036050,8004600-8004757,7999321	C3	LONG_Neural	28.47	-6.73	NO_REG	HsaEX6031167	0.06	0
nfasca	DreEX0050374	chr11:23625456-23625605	150	chr11:23607479,23625456-23625605,23630270	C1	LONG_Neural	33.38	-4.9	NO_REG	HsaEX0042673	8.66	NA
arvcfb	DreEX0015024	chr5:25892888-25893121	234	chr5:25897936,25892888-25893121,25805301	C1	LONG_Neural	78.5	6.18	NO_REG	HsaEX0006135	4.41	NA
plekha7b	DreEX0056239	chr7:26955264-26955420	157	chr7:26950458,26955264-26955420,26959692	C1	LONG_Neural	36.13	-13.22	NO_REG	HsaEX0048280	10.31	4.21
itga6b	DreEX0040095	chr1:30234813-30234929	117	chr1:30232846,30234813-30234929,30237382	C3	LONG_Neural	30.01	-2.96	NO_REG	HsaEX0032368	1.23	-0.63
p4ha1b	DreEX0053060	chr17:20131869-20131939	71	chr17:20136846,20131869-20131939,20130057	C3	LONG_Neural	47.01	0.35	NO_REG	HsaEX0045118	-3.79	7.53
MICU3 (1 of 2)	DreEX0005965	chr14:30127299-30127394	96	chr14:30133958,30127299-30127394,30126231	C1	LONG_Neural	72.48	-6.83	NO_REG	HsaEX0021726	2.02	NA
hspg2	DreEX0038426	chr23:26680227-26680310	84	chr23:26688051,26680227-26680310,26679003	C1	LONG_Neural	58.95	-4.9	NO_REG	HsaEX0030666	0.99	NA
tp53bp1	DreEX0080695	chr7:52647557-52647691	135	chr7:52647315,52647557-52647691,52650229	S	LONG_Neural	53.05	-22.31	NO_REG	HsaEX0066581	1.59	1.54
zdhhc5b	DreEX0086312	chr14:50033868-50034616	749	chr14:50031868,50033868-50034616,50040719	C1	LONG_Neural	61.4	-23.72	NO_REG	HsaEX6002038	0.3	-0.04
ZNF384 (2 of 2)	DreEX0009634	chr16:21877962-21878186	225	chr16:21878749,21877962-21878186,21872568	S	LONG_Neural	47.8	-22.9	NO_REG	HsaEX6064807	0.04	-1.41
slc44a1b	DreEX0072941	chr14:6069986-6070155	170	chr14:6070258,6069986-6070155,6061383	C2	LONG_Neural	80.15	-14.53	NO_REG	HsaEX0059710	-3.39	-1.71
slc44a1b	DreEX0072942	chr14:6064887-6064976	90	chr14:6070258,6064887-6064976,6061383	C2	LONG_Neural	89.68	-18.26	NO_REG	HsaEX6062310	-0.08	0
sgip1a	DreEX0065782	chr6:30757868-30757954	87	chr6:30758479,30757868-30757954,30756551	S	LONG_Neural	57.04	-0.7	NO_REG	HsaEX6031469	-0.12	NA
pkma	DreEX0055838	chr18:1051998-1052164	167	chr18:1047099,1051998-1052164,1056400	C3	LONG_Neural	57.22	-10.27	NO_REG	HsaEX6033882	0	NA
MAP4 (2 of 2)	DreEX0005770	chr24:40931157-40931249	93	chr24:40924956,40931157-40931249,40931634	C2	LONG_Neural	51.17	7.34	NO_REG	HsaEX0037621	-12.49	4.2
pfkpa	DreEX0054824	chr24:3943223-3943318	96	chr24:3942691,3943223-3943318,3950179	C3	LONG_Neural	73.87	-45.87	NO_REG	HsaEX6066239	-0.08	0
ppp1r1c	DreEX0057628	chr9:44681722-44681925	204	chr9:44667592,44681722-44681925,44683845	C1	LONG_Neural	76.32	-18.84	NO_REG	HsaEX0049621	1.26	-16.36
scn1ba	DreEX0064515	chr16:41946903-41946974	72	chr16:41946394,41946903-41946974,41947066	S	LONG_Neural	84.49	-22.44	NO_REG	HsaEX6094433	0	0
dync1i2a	DreEX0028600	chr9:3181502-3181555	54	chr9:3177785,3181502-3181555,3182884	S	LONG_Neural	46.28	-20.77	NO_REG	HsaEX6016705	1.08	0
ESYT2 (2 of 2)	DreEX0004040	chr7:39916482-39916538	57	chr7:39915798,39916482-39916538,39917199	C3	LONG_Neural	69.1	-21.97	NO_REG	HsaEX0023247	-13.92	6.19
lims1	DreEX0043059	chr11:33339781-33339914	134	chr11:33341719,33339781-33339914,33338576	ANN	LONG_Neural	26.83	-8.7	NO_REG	HsaEX0035844	0	0
VAV3 (1 of 3)	DreEX6095616	chr24:29620544-29620629	86	chr24:29647003,29620544-29620629,29619173	ANN	LONG_Neural	50.2	13.44	NO_REG	HsaEX6032481	0	0
abi2b	DreEX0010331	chr6:9765314-9765547	234	chr6:9762138,9765314-9765547,9767992	S	LONG_Neural	53.61	-12.25	NO_G_ORTH	NA	NA	NA
klhl4	DreEX0041945	chr14:26507285-26507953	669	chr14:26498874,26507285-26507953,26527349	S	LONG_Neural	25.36	-33.5	NO_G_ORTH	NA	NA	NA
slc23a2	DreEX0072196	chr8:42930576-42930639	64	chr8:42911038,42930576-42930639,42934640	S	LONG_Neural	33.54	-8.83	NO_G_ORTH	NA	NA	NA
ptena	DreEX0059204	chr17:23642742-23642810	69	chr17:23643510,23642742-23642810,23639974	S	LONG_Neural	49.41	-10.8	NO_G_ORTH	NA	NA	NA
CABZ01102039.1	DreEX0002234	chr12:10916-10988	73	chr12:13463,10916-10988,10471	S	LONG_Neural	61.19	-4	NO_G_ORTH	NA	NA	NA
si:dkey-30k6.7	DreEX0070561	chr21:20304393-20304479	87	chr21:20303530,20304393-20304479,20304831	S	LONG_Neural	49.1	NA	NO_G_ORTH	NA	NA	NA
phf21aa	DreEX0055077	chr7:38569666-38569749	84	chr7:38571142,38569666-38569749,38568686	S	LONG_Neural	66.8	-1.14	NO_G_ORTH	NA	NA	NA
rab41	DreEX0060291	chr14:32944829-32944922	94	chr14:32948084,32944829-32944922,32943770	C3	LONG_Neural	91.61	-27.03	NO_G_ORTH	NA	NA	NA
si:ch1073-188e1.1	DreEX0066236	chr22:6758484-6758676	193	chr22:6758791,6758484-6758676,6756151	S	LONG_Neural	81.42	NA	NO_G_ORTH	NA	NA	NA
si:ch211-269i23.2	DreEX0068179	chr1:30275790-30275906	117	chr1:30279202,30275790-30275906,30271239	C1	LONG_Neural	58.83	-7.85	NO_G_ORTH	NA	NA	NA
mast4	DreEX0045172	chr5:54382126-54382206	81	chr5:54400097,54382126-54382206,54373394	S	LONG_Neural	57.62	-19.4	NO_G_ORTH	NA	NA	NA
cux1a	DreEX0025146	chr10:33004079-33004165	87	chr10:33006572,33004079-33004165,33000611	C2	LONG_Neural	29.41	-17.63	NO_G_ORTH	NA	NA	NA
atrxl	DreEX0016215	chr5:22556650-22556864	215	chr5:22555221,22556650-22556864,22558446	C2	LONG_Neural	71.3	5.03	NO_G_ORTH	NA	NA	NA
oxr1b	DreEX0052969	chr19:7399617-7399697	81	chr19:7408489,7399617-7399697,7395040	C2	LONG_Neural	28.87	-12.91	NO_G_ORTH	NA	NA	NA
wu:fc30c06	DreEX0085516	chr4:71609557-71609723	167	chr4:71612351,71609557-71609723,71601344	C3	LONG_Neural	63.64	-11.19	NO_G_ORTH	NA	NA	NA
si:dkey-224k5.13	DreEX0070034	chr4:4217040-4217095	56	chr4:4219558,4217040-4217095,4215920	S	LONG_Neural	61.83	1.69	NO_G_ORTH	NA	NA	NA
uhrf1bp1l	DreEX0083287	chr4:18248826-18248876	51	chr4:18251212+18251293,18248796+18248826-18248876,18248466	S	LONG_Neural	58.72	-4.14	NO_EV_ORTH	NA	NA	NA
eif4g1a	DreEX0029559	chr2:17148682-17148792	111	chr2:17146200+17146209,17148682-17148792,17150300+17150303	S	LONG_Neural	32.8	-3.64	NO_EV_ORTH	NA	NA	NA
si:ch211-89p3.3	DreEX0068563	chr20:35298537-35298611	75	chr20:35295936,35298537-35298611,35301599	S	LONG_Neural	50.73	2.64	NO_EV_ORTH	NA	NA	NA
rhbdf1b	DreEX0062037	chr12:20136216-20136329	114	chr12:20142003,20136216-20136329,20129438	S	LONG_Neural	78.58	-19.34	NO_EV_ORTH	NA	NA	NA
NOS1AP	DreEX0006377	chr5:32946180-32946396	217	chr5:32954672,32946180-32946396,32938161	S	LONG_Neural	26.63	-1.79	NO_EV_ORTH	NA	NA	NA
usp6nl	DreEX0083961	chr4:24058525-24058585	61	chr4:24058805,24058525-24058585,24055124	S	LONG_Neural	34.16	-4.64	NO_EV_ORTH	NA	NA	NA
si:dkey-40c11.1	DreEX0070670	chr5:43020488-43020578	91	chr5:43021319,43020488-43020578,43017716	S	LONG_Neural	71.59	-29.7	NO_EV_ORTH	NA	NA	NA
chchd3a	DreEX0021341	chr4:15601823-15601880	58	chr4:15602159,15601823-15601880,15587186	S	LONG_Neural	35.5	-19.26	NO_EV_ORTH	NA	NA	NA
ifrd2	DreEX0038708	chr8:26395172-26395231	60	chr8:26391442+26391448,26395172-26395231,26398118	S	LONG_Neural	71.06	-5.67	NO_EV_ORTH	NA	NA	NA
vamp4	DreEX0084104	chr20:15081154-15081282	129	chr20:15072221+15072276,15081154-15081282,15087713	S	LONG_Neural	64.67	-22.06	NO_EV_ORTH	NA	NA	NA
sptbn2	DreEX0074997	chr5:37103986-37104087	102	chr5:37103588,37103986-37104087,37106619+37106622	S	LONG_Neural	47.63	-2.42	NO_EV_ORTH	NA	NA	NA
map2	DreEX0044539	chr9:39161448-39161504	57	chr9:39159762,39161448-39161504,39164965	S	LONG_Neural	57.41	-10.04	NO_EV_ORTH	NA	NA	NA
scn1ba	DreEX0064517	chr16:41938358-41938453	96	chr16:41924020,41938358-41938453,41938887	S	LONG_Neural	28.53	-2.84	NO_EV_ORTH	NA	NA	NA
arhgef28	DreEX0014550	chr5:34277961-34278062	102	chr5:34279436,34277961-34278062,34275705	S	LONG_Neural	57.38	NA	NO_EV_ORTH	NA	NA	NA
CAPN15	DreEX0002318	chr24:39145796-39146514	719	chr24:39139812,39145796-39146514,39163189	S	LONG_Neural	40.73	-1	NO_EV_ORTH	NA	NA	NA
kif21a	DreEX0041581	chr25:35221089-35221157	69	chr25:35220180,35221089-35221157,35222885	S	LONG_Neural	38.18	-12.94	NO_EV_ORTH	NA	NA	NA
myom1a	DreEX0048863	chr2:30967508-30967579	72	chr2:30966456,30967508-30967579,30967812	S	LONG_Neural	37.09	-7.83	NO_EV_ORTH	NA	NA	NA
dip2ca	DreEX0027037	chr24:27062530-27062655	126	chr24:27054874+27054883,27062530-27062655,27070389	S	LONG_Neural	72.74	-14.19	NO_EV_ORTH	NA	NA	NA
SATB1	DreEX0007703	chr16:49249680-49249757	78	chr16:49251524,49249680-49249757,49239022	S	LONG_Neural	32.96	-12.98	NO_EV_ORTH	NA	NA	NA
SLC35G1	DreEX0008059	chr12:5181719-5181814	96	chr12:5175318,5181719-5181814,5184191	S	LONG_Neural	36.15	-9.11	NO_EV_ORTH	NA	NA	NA
pip4k2ab	DreEX0055662	chr2:21484897-21484992	96	chr2:21480460,21484897-21484992,21492830	S	LONG_Neural	69.13	13.15	NO_EV_ORTH	NA	NA	NA
myh14	DreEX0048368	chr16:16991976-16992047	72	chr16:16990822,16991976-16992047,16994032	S	LONG_Neural	85.28	-12.48	NO_EV_ORTH	NA	NA	NA
flna	DreEX0032965	chr23:19852901-19853001	101	chr23:19851651,19852901-19853001,19855725	S	LONG_Neural	30.01	4.22	NO_EV_ORTH	NA	NA	NA
arhgap21b	DreEX0014276	chr2:12718256-12718616	361	chr2:12717575,12718256-12718616,12720664	S	LONG_Neural	52.06	-19.3	NO_EV_ORTH	NA	NA	NA
MYRIP (2 of 2)	DreEX0006220	chr2:31649919-31649978	60	chr2:31651591,31649919-31649978,31647230	S	LONG_Neural	69.87	-15.08	NO_EV_ORTH	NA	NA	NA
diaph2	DreEX0026935	chr14:39087086-39087148	63	chr14:39078520,39087086-39087148,39090285	S	LONG_Neural	46.49	-12.07	NO_EV_ORTH	NA	NA	NA
crtc1a	DreEX0024351	chr2:24931587-24931691	105	chr2:24934331,24931587-24931691,24928406	S	LONG_Neural	51.64	-27.27	NO_EV_ORTH	NA	NA	NA
SPAG9 (2 of 2)	DreEX0008319	chr12:899587-899649	63	chr12:903896,899587-899649,896582	S	LONG_Neural	48.94	-10.84	NO_EV_ORTH	NA	NA	NA
ctnnd1	DreEX0024875	chr1:43494933-43495084	152	chr1:43472005+43472291,43494933-43495084,43499925	S	LONG_Neural	59.26	-8.26	NO_EV_ORTH	NA	NA	NA
PHC3	DreEX0006706	chr24:26269915-26270052	138	chr24:26267442,26269915-26270052,26270135	S	LONG_Neural	50.28	-9.98	NO_EV_ORTH	NA	NA	NA
mcf2l2	DreEX0045411	chr11:10492732-10492826	95	chr11:10499433,10492732-10492826,10485898	S	LONG_Neural	37.52	-13.33	NO_EV_ORTH	NA	NA	NA
COL23A1	DreEX0002964	chr21:32062900-32062965	66	chr21:32063109,32062900-32062965,32059493	S	LONG_Neural	42.98	-1.7	NO_EV_ORTH	NA	NA	NA
dlg5b.1	DreEX0027266	chr12:48916295-48916372	78	chr12:48915596,48916295-48916372,48916804	S	LONG_Neural	41.13	-24.16	NO_EV_ORTH	NA	NA	NA
si:dkey-161j23.5	DreEX0069432	chr24:39651898-39651971	74	chr24:39649779,39651898-39651971,39654305+39654401	S	LONG_Neural	72.68	-6.32	NO_EV_ORTH	NA	NA	NA
UNC13B (2 of 2)	DreEX0009263	chr10:16991600-17001594	9995	chr10:16990875,16991600-17001594,17002193	S	LONG_Neural	83.2	-5.55	NO_EV_ORTH	NA	NA	NA
agap2	DreEX0011975	chr23:36589547-36590933	1387	chr23:36601839,36589547-36590933,36582781	S	LONG_Neural	77.69	NA	NO_EV_ORTH	NA	NA	NA
CLCC1	DreEX0002815	chr22:24593154-24593207	54	chr22:24590363,24593154-24593207+24593231,24593825	S	LONG_Neural	44.4	-26.05	NO_EV_ORTH	NA	NA	NA
MTMR4	DreEX0006090	chr5:2114714-2114941	228	chr5:2134452,2114714-2114941,2084511	S	LONG_Neural	30.76	-10.04	NO_EV_ORTH	NA	NA	NA
trak2	DreEX0081028	chr6:4045572-4045628	57	chr6:4055677,4045572-4045628,4043514	S	LONG_Neural	60.42	-32.57	NO_EV_ORTH	NA	NA	NA
sec24c	DreEX0064859	chr12:35469582-35469668	87	chr12:35473052,35469582-35469668,35468508	S	LONG_Neural	53.68	-7.81	NO_EV_ORTH	NA	NA	NA
arhgap44	DreEX0014381	chr12:48548156-48548554	399	chr12:48546513,48548156-48548554,48549199	S	LONG_Neural	26.01	-31.01	NO_EV_ORTH	NA	NA	NA
scrib	DreEX0064603	chr7:40970433-40970489	57	chr7:40969991,40970433-40970489,40970729	S	LONG_Neural	86.61	-9.46	NO_EV_ORTH	NA	NA	NA
sorbs2a	DreEX0074461	chr1:17101508-17101894	387	chr1:17106691,17101508-17101894,17100060	C3	LONG_Neural	77.77	-20.15	NO_EV_ORTH	NA	NA	NA
fgfr1op	DreEX0032668	chr20:30700218-30700307	90	chr20:30697346,30700218-30700307,30700441	C1	LONG_Neural	63.28	-15.6	NO_EV_ORTH	NA	NA	NA
pfn2l	DreEX0054846	chr2:10351759-10351857	99	chr2:10350753,10351759-10351857,10352082	S	LONG_Neural	58.25	-3.72	NO_EV_ORTH	NA	NA	NA
picalma	DreEX0055376	chr10:29312492-29312572	81	chr10:29301335,29312492-29312572,29314982	S	LONG_Neural	62.9	-10.43	NO_EV_ORTH	NA	NA	NA
pbx3b	DreEX0053812	chr8:33934260-33934337	78	chr8:33934903,33934260-33934337,33931474	C1	LONG_Neural	48.97	-12.15	NO_EV_ORTH	NA	NA	NA
rapgef1b	DreEX0060827	chr21:4032089-4032235	147	chr21:4023746,4032089-4032235,4036128	C1	LONG_Neural	78.88	-23.22	NO_EV_ORTH	NA	NA	NA
mark3a	DreEX0045083	chr13:15530586-15530695	110	chr13:15527158,15530586-15530695,15536593	C2	LONG_Neural	57.63	-10.48	NO_EV_ORTH	NA	NA	NA
cdc14b	DreEX0020101	chr8:1156996-1157061	66	chr8:1164574,1156996-1157061,1156873	C1	LONG_Neural	63.73	-32.44	NO_EV_ORTH	NA	NA	NA
ppfibp2b	DreEX0057370	chr25:15912409-15912537	129	chr25:15912176,15912409-15912537,15914507	S	LONG_Neural	25.31	-19.62	NO_EV_ORTH	NA	NA	NA
smap1	DreEX0073609	chr13:28053732-28053803	72	chr13:28066453,28053732-28053803,28046260+28046263	S	LONG_Neural	65.89	-10.75	NO_EV_ORTH	NA	NA	NA
neb	DreEX0050004	chr9:23003156-23003248	93	chr9:23007266,23003156-23003248,23001038	C3	LONG_Neural	28.68	-12.66	NO_EV_ORTH	NA	NA	NA
asap1b	DreEX0015075	chr24:10775383-10775451	69	chr24:10776660,10775383-10775451,10768820	C3	LONG_Neural	75.69	-59.29	NO_EV_ORTH	NA	NA	NA
ckmt2b	DreEX0021892	chr5:50955856-50955941	86	chr5:50953728,50955856-50955941,50957959	C3	LONG_Neural	50.07	-69.34	NO_EV_ORTH	NA	NA	NA
mef2d	DreEX0045894	chr16:29150264-29150332	69	chr16:29154109,29150264-29150332,29142067	C1	LONG_Neural	34.83	-0.7	NO_EV_ORTH	NA	NA	NA
map7d2b	DreEX0044802	chr24:24000391-24000444	54	chr24:24001425,24000391-24000444+24000483,23993756+23993789	S	LONG_Neural	62.01	-0.97	NO_EV_ORTH	NA	NA	NA
map2	DreEX0044545	chr9:39142489-39142704	216	chr9:39138641,39142489-39142704,39157034	C3	LONG_Neural	33.83	1.68	NO_EV_ORTH	NA	NA	NA
cd99l2	DreEX0020042	chr7:25618373-25618477	105	chr7:25621122,25618373-25618477+25618480,25617745	S	LONG_Neural	65.67	-12.6	NO_EV_ORTH	NA	NA	NA
cdc14ab	DreEX0020083	chr22:16177578-16177687	110	chr22:16177856,16177578-16177687,16175605	C1	LONG_Neural	35.62	-16.23	NO_EV_ORTH	NA	NA	NA
bin1b	DreEX0016940	chr6:6847134-6847385	252	chr6:6848003,6847035+6847134-6847385,6846875	C3	LONG_Neural	49.61	-21.95	NO_EV_ORTH	NA	NA	NA
kdm2aa	DreEX0041111	chr1:44157485-44157643	159	chr1:44157229,44157485-44157643,44157997	S	LONG_Neural	54.69	-14.74	NO_EV_ORTH	NA	NA	NA
abi3a	DreEX0010339	chr3:33267927-33268058	132	chr3:33268262,33267927-33268058,33266658	C2	LONG_Neural	52.15	-23.58	NO_EV_ORTH	NA	NA	NA
abi3a	DreEX0010340	chr3:33266916-33267011	96	chr3:33267927,33266916-33267011,33266658	C2	LONG_Neural	56.2	-28.57	NO_EV_ORTH	NA	NA	NA
nin	DreEX0050637	chr13:36692942-36694987	2046	chr13:36695725,36692942-36694987,36691758+36691800	S	LONG_Neural	47.01	-11.17	NO_EV_ORTH	NA	NA	NA
rnf220a	DreEX0062664	chr2:33226051-33226221	171	chr2:33225304,33226051-33226221,33226422	S	LONG_Neural	26.38	-10.02	NO_EV_ORTH	NA	NA	NA
gltscr1	DreEX0035142	chr18:44638038-44638103	66	chr18:44637550,44638038-44638103,44638335	S	LONG_Neural	78.26	-12.49	NO_EV_ORTH	NA	NA	NA
ubap2l	DreEX0082728	chr19:7870347-7870502	156	chr19:7868295,7870347-7870502,7875692	S	LONG_Neural	41.2	-8.4	NO_EV_ORTH	NA	NA	NA
efr3bb	DreEX0029164	chr20:43004180-43004481	302	chr20:42994430,43004180-43004481,43021732	S	LONG_Neural	41.89	-4.54	NO_EV_ORTH	NA	NA	NA
csde1	DreEX0024480	chr8:22514524-22514812	289	chr8:22517132,22514524-22514812,22512433	C1	LONG_Neural	43.89	-8.48	NO_EV_ORTH	NA	NA	NA
slc4a11	DreEX0073024	chr13:13747917-13747976	60	chr13:13737020,13747917-13747976,13748355	S	LONG_Neural	44.36	-31.21	NO_EV_ORTH	NA	NA	NA
hspg2	DreEX0038425	chr23:26681011-26681073	63	chr23:26688051,26681011-26681073+26681076,26679003	C2	LONG_Neural	41.95	-5.81	NO_EV_ORTH	NA	NA	NA
mcf2l2	DreEX0045412	chr11:10517588-10517683	96	chr11:10520137,10517588-10517683,10501716	C2	LONG_Neural	93.46	9.88	NO_EV_ORTH	NA	NA	NA
mcf2l2	DreEX0045413	chr11:10514493-10514576	84	chr11:10520137,10514493-10514576,10501716	C3	LONG_Neural	86.09	17.75	NO_EV_ORTH	NA	NA	NA
mcf2l2	DreEX0045414	chr11:10508172-10508243	72	chr11:10520137,10508172-10508243,10501716	C3	LONG_Neural	85.51	24.06	NO_EV_ORTH	NA	NA	NA
mcf2l2	DreEX0045416	chr11:10502015-10502104	90	chr11:10520137,10502015-10502104,10501716	C2	LONG_Neural	74.53	14.07	NO_EV_ORTH	NA	NA	NA
gphna	DreEX0035712	chr17:34179004-34179078	75	chr17:34176934,34179004-34179078,34188878	C3	LONG_Neural	64.55	-36.44	NO_EV_ORTH	NA	NA	NA
TP53INP2	DreEX0009000	chr23:2603777-2603945	169	chr23:2602112,2603777-2603945,2604053	S	LONG_Neural	32.11	-17.02	NO_EV_ORTH	NA	NA	NA
EPB41L2	DreEX0003957	chr20:2284168-2284242	75	chr20:2293244,2284168-2284242,2268975	C3	LONG_Neural	34.33	-7.89	NO_EV_ORTH	NA	NA	NA
dlg2	DreEX0027223	chr10:29549506-29549565	60	chr10:29545905,29549506-29549565,29651263	S	LONG_Neural	72.82	-24.52	NO_EV_ORTH	NA	NA	NA
ANKRD7	DreEX0000438	chr25:3452138-3452195	58	chr25:3453593,3452138-3452195,3449838	S	LONG_Neural	58.68	-17.31	NO_EV_ORTH	NA	NA	NA
ANKRD7	DreEX0000440	chr25:3506513-3508476	1964	chr25:3510272,3506513-3508476,3505704	C3	LONG_Neural	27.56	-7.78	NO_EV_ORTH	NA	NA	NA
tox2	DreEX0080669	chr6:58041492-58041579	88	chr6:58152323,58041492-58041579+58041584,58030546	S	LONG_Neural	38.62	-3.1	NO_EV_ORTH	NA	NA	NA
lrch3	DreEX0043584	chr18:3528483-3528563	81	chr18:3526512,3528483-3528563,3533137	C2	LONG_Neural	30.57	0.39	NO_EV_ORTH	NA	NA	NA
fgd4a	DreEX0032569	chr18:12235200-12235254	55	chr18:12228367,12235200-12235254,12238152	S	LONG_Neural	46.64	-1.72	NO_EV_ORTH	NA	NA	NA
MAP4 (2 of 2)	DreEX0005766	chr24:40838989-40839198	210	chr24:40829723,40838989-40839198,40858311	C3	LONG_Neural	70.48	-0.49	NO_EV_ORTH	NA	NA	NA
ARHGAP44 (1 of 2)	DreEX0000604	chr3:44515918-44516457	540	chr3:44520359,44515918-44516457,44500513	C1	LONG_Neural	44.35	-33.17	NO_EV_ORTH	NA	NA	NA
arhgap21a	DreEX0014265	chr24:6491015-6491344	330	chr24:6494043,6491015-6491344+6491406,6487917	S	LONG_Neural	62.8	-32.4	NO_EV_ORTH	NA	NA	NA
rtn4b	DreEX0063677	chr13:134155-135213	1059	chr13:136341,134155-135213,133057	S	LONG_Neural	55.74	-1.89	NO_EV_ORTH	NA	NA	NA
zmynd8	DreEX0087976	chr11:18439160-18439613	454	chr11:18442070,18439160-18439613,18431547	S	LONG_Neural	34.72	8.55	NO_EV_ORTH	NA	NA	NA
prg4b	DreEX0058116	chr20:34129082-34129168	87	chr20:34128106,34129082-34129168,34129307	S	LONG_Neural	59.96	NA	NO_EV_ORTH	NA	NA	NA
enah	DreEX0029935	chr20:36536741-36537469	729	chr20:36546403,36536741-36537469,36534694	S	LONG_Neural	67.37	-15.08	NO_EV_ORTH	NA	NA	NA
med25	DreEX0045834	chr3:30330217-30330288	72	chr3:30330459,30330217-30330288,30327758	C3	LONG_Neural	59.15	-7.94	NO_EV_ORTH	NA	NA	NA
arvcfb	DreEX0015020	chr5:25897936-25898053	118	chr5:25914829,25897936-25898053,25893121	C2	LONG_Neural	78.81	2.79	NO_EV_ORTH	NA	NA	NA
kif20ba	DreEX0041557	chr17:23478057-23478116	60	chr17:23474878,23478057-23478116,23483888	S	LONG_Neural	45.39	-7.2	NO_EV_ORTH	NA	NA	NA
fndc3ba	DreEX0033221	chr2:25725709-25725882	174	chr2:25722942,25725709-25725882,25726145	S	LONG_Neural	27.18	-2.7	NO_EV_ORTH	NA	NA	NA
pkn3	DreEX0055881	chr5:31251573-31252395	823	chr5:31252489,31251573-31252395,31248668	S	LONG_Neural	51.41	-1.15	NO_EV_ORTH	NA	NA	NA
cep162	DreEX0020866	chr16:37952522-37952803	282	chr16:37949839,37952522-37952803,37956117	C3	LONG_Neural	35.65	16.43	NO_EV_ORTH	NA	NA	NA
klhl13	DreEX0041885	chr5:36798185-36798256	72	chr5:36783097,36798185-36798256,36806205	C3	LONG_Neural	60.21	-17.05	NO_EV_ORTH	NA	NA	NA
vdac3	DreEX6047922	chr8:2369456-2369528	73	chr8:2374871,2369456-2369528,2367967	ANN	LONG_Neural	53.16	-6.64	NO_EV_ORTH	NA	NA	NA
elavl1	DreEX0029649	chr2:37148848-37148907	60	chr2:37149049,37148848-37148907,37147504	ANN	LONG_Neural	31.38	-4.9	NO_EV_ORTH	NA	NA	NA
limch1b	DreEX6057546	chr14:16667461-16667841	381	chr14:16662672,16667461-16667841,16687881	ANN	LONG_Neural	28.6	-33.52	NO_EV_ORTH	NA	NA	NA
dct	DreEX0025996	chr9:53798377-53798676	300	chr9:53788527+53788532,53798377-53798676,53801424+53801445	S	LONG_Neural	92.05	0	NO_COV	HsaEX6040704	NA	NA
arhgap23a	DreEX0014280	chr3:39196072-39196230	159	chr3:39206224,39196072-39196230,39193601+39193604	S	LONG_Neural	44.8	0.08	NO_COV	HsaEX1004454	NA	NA
lrp1bb	DreEX0043719	chr9:36879427-36879501	75	chr9:36876568,36879427-36879501,36885063	S	LONG_Neural	41.85	-17.33	NO_COV	HsaEX6015793	NA	NA
slc12a7b	DreEX0071944	chr24:39899710-39899820	111	chr24:39901536,39899710-39899820,39896521	S	LONG_Neural	60.02	-14.85	NO_COV	HsaEX6078458	NA	NA
DGKI	DreEX0003577	chr4:4622661-4622716	56	chr4:4626714,4622661-4622716+4622723,4619735	S	LONG_Neural	64.17	-21.34	NO_COV	HsaEX0019441	NA	NA
CNTNAP3	DreEX0002893	chr10:2359686-2359757	72	chr10:2357374,2359686-2359757,2365881	S	LONG_Neural	48.53	-10.95	NO_COV	HsaEX6044996	NA	NA
magi1a	DreEX0044352	chr8:53663034-53663122	89	chr8:53662896,53663034-53663122,53665184	S	LONG_Neural	78.72	-57.14	NO_COV	HsaEX0037263	NA	NA
magi1b	DreEX0044369	chr11:18923760-18923839	80	chr11:18922367+18922753,18923760-18923839,18926641	S	LONG_Neural	80.64	-46.46	NO_COV	HsaEX0037263	NA	NA
camk2b1	DreEX0018584	chr5:20474828-20474923	96	chr5:20477739,20474828-20474923,20463010+20463013	S	LONG_Neural	69.92	-17.22	NO_COV	HsaEX0012216	NA	0
dmrt2a	DreEX0027375	chr5:44409298-44409363	66	chr5:44409137,44409298-44409363,44409566	S	LONG_Neural	49.75	0	NO_COV	HsaEX0019994	NA	NA
cacna1aa	DreEX0017974	chr3:33675422-33675518	97	chr3:33677435,33675422-33675518,33670945	C3	LONG_Neural	64.56	-17.05	NO_COV	HsaEX0011917	NA	NA
si:dkey-68o6.4	DreEX0070846	chr3:24447397-24447536	140	chr3:24447297,24447397-24447536,24447616	C2	LONG_Neural	46.32	NA	NO_COV	HsaEX0061111	NA	NA
ABCC3	DreEX0000059	chr12:764218-764531	314	chr12:757853,764218-764531,771781	C3	LONG_Neural	42.91	-8.75	NO_COV	HsaEX6023589	NA	NA
dlg2	DreEX0027227	chr10:29706525-29706683	159	chr10:29704106,29706525-29706683,29730292	C1	LONG_Neural	54.21	5.53	NO_COV	HsaEX0019886	NA	NA
cyp2k16	DreEX0025433	chr3:12620691-12620832	142	chr3:12611250,12620691-12620832,12628825	C3	LONG_Neural	48.31	-15.33	NO_COV	HsaEX6006789	NA	NA
cntnap5b	DreEX0022683	chr22:13509000-13509203	204	chr22:13515077,13509000-13509203,13501764	C3	LONG_Neural	69.27	1.14	NO_COV	HsaEX6015359	NA	NA
cntnap5b	DreEX6098067	chr22:13501580-13501764	185	chr22:13515077,13501580-13501764,13485402	ANN	LONG_Neural	76.05	2.47	NO_COV	HsaEX6045011	NA	NA
